1 **Peroxisomes control mitochondrial dynamics and the mitochondrion-**  
2 **dependent pathway of apoptosis**

3

4 Hideaki Tanaka<sup>1</sup>, Tomohiko Okazaki<sup>1</sup>, Mutsumi Yokota<sup>2</sup>, Masato Koike<sup>2</sup>, Yasushi  
5 Okada<sup>3,4</sup>, Yukio Fujiki<sup>5</sup>, Yukiko Gotoh<sup>1</sup>

6

7 <sup>1</sup>Graduate School of Pharmaceutical Sciences, IRCN, The University of Tokyo,  
8 Tokyo 113-0033, Japan; <sup>2</sup>Department of Cell Biology and Neuroscience,  
9 Juntendo University School of Medicine, Tokyo 113-8421, Japan; <sup>3</sup>Laboratory for  
10 Cell Dynamics Observation, Center for Biosystems Dynamics Research (BDR),  
11 RIKEN, Osaka 565-0874, Japan; <sup>4</sup>Department of Physics, Universal Biology  
12 Institute (UBI), and the International Research Center for Neurointelligence (WPI-  
13 IRCN), The University of Tokyo, Tokyo 113-0033, Japan; <sup>5</sup>Division of Organelle  
14 Homeostasis, Medical Institute of Bioregulation, Kyushu University, Fukuoka  
15 812-8582, Japan.

16

17

18 Correspondence to Tomohiko Okazaki: [tokazaki@mol.f.u-tokyo.ac.jp](mailto:tokazaki@mol.f.u-tokyo.ac.jp), Yukiko  
19 Gotoh: [ygotoh@mol.f.u-tokyo.ac.jp](mailto:ygotoh@mol.f.u-tokyo.ac.jp)

20

21

22 Short running title: Peroxisomes regulate mitochondrial dynamics

23 Key words: organelle, peroxisome, mitochondria, apoptosis, Drp1, caspase

24

1 Nonstandard abbreviations: Drp1, dynamin-related protein 1; CCCP,  
2 carbonylcyanide m-chlorophenylhydrazone; KO, knockout; MAM, mitochondrion-  
3 associated membrane; MEF, mouse embryonic fibroblast; NAC, *N*-  
4 acetylcysteine; OXPHOS, oxidative phosphorylation; 4-PBA, 4-phenylbutyrate;  
5 Pex, peroxin; PTS1, peroxisome-targeting signal 1; ROS, reactive oxygen  
6 species; TBHP, *tert*-butylhydroperoxide.

7

## 8 **Summary Statements**

9 We unveil a previously unrecognized role of peroxisomes in the regulation of  
10 mitochondrial fission-fusion dynamics, mitochondrion-dependent caspase  
11 activation, and cellular apoptosis.

12

1 **Abstract**

2 Peroxisomes cooperate with mitochondria in the performance of cellular  
3 metabolic functions such as fatty acid oxidation and maintenance of redox  
4 homeostasis. Whether peroxisomes also regulate mitochondrial fission-fusion  
5 dynamics or mitochondrion-dependent apoptosis has remained unclear, however.  
6 We now show that genetic ablation of the peroxins Pex3 or Pex5, which are  
7 essential for peroxisome biogenesis, resulted in mitochondrial fragmentation in  
8 mouse embryonic fibroblasts (MEFs) in a manner dependent on dynamin-related  
9 protein 1 (Drp1). Conversely, treatment with 4-phenylbutyric acid, an inducer of  
10 peroxisome proliferation, resulted in mitochondrial elongation in wild-type MEFs,  
11 but not in Pex3-deficient MEFs. We further found that peroxisome deficiency  
12 increased the levels of cytosolic cytochrome *c* and caspase activity under basal  
13 conditions without inducing apoptosis. It also greatly enhanced etoposide-  
14 induced caspase activation and apoptosis, indicative of an enhanced cellular  
15 sensitivity to death signals. Together, our data unveil a previously unrecognized  
16 role of peroxisomes in the regulation of mitochondrial dynamics and  
17 mitochondrion-dependent apoptosis. Given that mutations of peroxin genes are  
18 responsible for lethal disorders such as Zellweger syndrome, effects of such  
19 mutations on mitochondrion-dependent apoptosis may contribute to disease  
20 pathogenesis.

21

22

## 1 **Introduction**

2 Peroxisomes are organelles bound by a single membrane that play essential  
3 roles in metabolic functions such as oxidation of fatty acid chains, catabolism of  
4 reactive oxygen species (ROS), and synthesis of ether phospholipids in all  
5 eukaryotic cells. The peroxin (Pex) family of proteins is required for the assembly  
6 and function of peroxisomes (Fujiki et al., 2012; Waterham and Ebberink, 2012).  
7 Deficiency of Pex3, a peroxisomal membrane protein necessary for membrane  
8 assembly, thus results in the complete loss of peroxisomes (Muntau et al., 2000),  
9 whereas deficiency of Pex5, a peroxisomal transporter, results in the loss of  
10 peroxisomal matrix proteins (Otera et al., 1998). Peroxisomal dysfunction due to  
11 *Pex* gene mutations is detrimental to human development, as evidenced by  
12 human autosomal recessive genetic diseases (known as peroxisome biogenesis  
13 disorders) such as Zellweger syndrome that result in death within the 1st year of  
14 life (Goldfischer et al., 1973). Peroxisome-deficient mice also die during the  
15 neonatal period (Baes et al., 1997; Maxwell et al., 2003). Both patients with  
16 peroxisome biogenesis disorders and peroxisome-deficient mice manifest a  
17 variety of characteristics including neurological dysfunction, hypotonia, and  
18 craniofacial abnormalities (Muntau et al., 2000; Trompier et al., 2014; Waterham  
19 and Ebberink, 2012).

20 Peroxisomes collaborate with other organelles in various physiological  
21 and pathological contexts. In particular, peroxisomes engage in a functional  
22 interplay with mitochondria with regard to the degradation of fatty acids and ROS  
23 detoxification as well as to antiviral immunity (Dixit et al., 2010; Lismont et al.,  
24 2015; Schrader and Yoon, 2007). The interplay between peroxisomes and

1 mitochondria is highlighted by the observation that the loss of *Pex* genes gives  
2 rise to abnormalities in mitochondrial structure and metabolic function. For  
3 instance, deletion of *Pex5* in mouse hepatocytes affects the structure of  
4 mitochondrial inner and outer membranes as well as gives rise to abnormal  
5 (swollen) cristae (Baumgart et al., 2001; Goldfischer et al., 1973; Peeters et al.,  
6 2015), reduced activity of oxidative phosphorylation (OXPHOS) complexes, loss  
7 of the mitochondrial membrane potential, and increased ROS levels (Peeters et  
8 al., 2015). Deletion of *Pex5* was also shown to increase the number of  
9 mitochondria as well as the level of glycolytic activity, possibly as a compensatory  
10 response to the impairment of OXPHOS (Peeters et al., 2015). Deletion of *Pex13*  
11 in mouse brain or of *Pex19* in fly larvae resulted in similar dysfunction of OXPHOS,  
12 elevated ROS levels, and an increased abundance of mitochondria (Bülow et al.,  
13 2018; Rahim et al., 2016). Furthermore, human patients harboring *PEX16*  
14 mutations manifest myopathy accompanied by mitochondrial abnormalities  
15 (Salpietro et al., 2015). It remains unclear, however, which of these various  
16 phenotypes in mice, flies, and humans reflect primary effects of peroxisome  
17 deficiency or are secondary to primary effects such as ROS accumulation.

18 In addition to their roles in OXPHOS and redox regulation, mitochondria  
19 are key players in the regulation of apoptosis. Various proteins that are normally  
20 localized to the intermembrane space of mitochondria, including cytochrome *c*,  
21 are released into the cytosol on apoptosis induction. In the cytosol, cytochrome *c*  
22 interacts with Apaf-1 and pro-caspase-9 to form a large protein complex known  
23 as the apoptosome. The resulting increase in the autocatalytic activity of pro-  
24 caspase-9 leads to the cleavage and activation of pro-caspase-3 and pro-

1 caspase-7, and the active forms of these latter two enzymes then execute  
2 apoptosis by cleaving numerous substrates (Wang and Youle, 2009).

3 Mitochondria are highly dynamic organelles that continually change their  
4 morphology by fission and fusion processes, which contributes to mitochondrial  
5 quality control and induction of apoptosis (Detmer and Chan, 2007; Suen et al.,  
6 2008). Mitochondrial fission and fusion are mediated by evolutionarily conserved  
7 members of the dynamin family of proteins. Fission is thus mediated by cytosolic  
8 dynamins such as Drp1 (dynamin-related protein 1) and Dyn2, whereas fusion is  
9 mediated by the membrane-anchored dynamins Mfn1-Mfn2 and Opa1,  
10 respectively, in mammals (Detmer and Chan, 2007; Lee et al., 2016). The fission  
11 process mediated by Drp1 appears to play a central role in the induction of  
12 cytochrome *c* release and subsequent apoptosis in various physiological and  
13 pathological contexts (Westermann, 2010).

14 Recent studies have shown that interactions with other organelles  
15 contribute to the regulation of mitochondrial dynamics. Sites of contact between  
16 mitochondria with ER (known as mitochondrion-associated membranes, MAMs)  
17 play an important role in the regulation of mitochondrial fission (Friedman et al.,  
18 2011) and have been implicated in that of apoptosis (Hoppins and Nunnari, 2012;  
19 Prudent et al., 2015; Yang et al., 2018). Lysosomes also participate in the  
20 regulation of mitochondrial dynamics (Wong et al., 2018). Mitochondria and  
21 peroxisomes share key regulators of their fission including Drp1 as well as Fis1  
22 and Mff1 (Camões et al., 2009; Delille et al., 2009; Kobayashi et al., 2007;  
23 Schrader, 2006). However, whether peroxisomes also regulate mitochondrial  
24 dynamics and mitochondrion-mediated apoptosis has remained unclear.

1           We have now investigated the role of peroxisomes in the regulation of  
2 mitochondrial dynamics, caspase activation, and apoptosis by deleting *Pex3* or  
3 *Pex5* in mouse embryonic fibroblasts (MEFs) under conditions in which the  
4 cytosolic ROS level does not increase substantially. We found that deletion of  
5 either *Pex3* or *Pex5* resulted in fragmentation of mitochondria, the appearance of  
6 cytochrome *c* in the cytosol, and an increase in the amounts of cleaved caspase-  
7 9 and caspase-3. Importantly, restoration of *Pex3* or *Pex5* expression in the  
8 corresponding knockout (KO) MEFs attenuated these effects. Furthermore, we  
9 found that ablation of *Pex3* greatly enhanced the induction of apoptosis by the  
10 DNA-damaging agent etoposide. Our results thus suggest that peroxisomes  
11 regulate mitochondrial dynamics, caspase activity, and cell death so as to reduce  
12 cellular sensitivity to damaging insults.

13

14

## 15 **Results**

16

### 17 **Induction of mitochondrial fragmentation by *Pex3* deletion**

18 To examine an acute effect of peroxisome deficiency, we took advantage of  
19 MEFs derived from *Pex3<sup>fl/fl</sup>;Rosa-Cre-ER<sup>T2</sup>* mice, which are homozygous for a  
20 floxed allele of *Pex3* and harbor a tamoxifen-inducible transgene for Cre  
21 recombinase (Fig. S1). We immortalized these cells by introducing SV40 large T  
22 antigen and deleted *Pex3* by adding 4-hydroxytamoxifen. Immunoblot analysis  
23 detected *Pex3* protein in control MEFs (not exposed to 4-hydroxytamoxifen) but  
24 not in *Pex3* KO MEFs (Fig. 1 A). Immunofluorescence analysis also detected

1 almost no punctate signals for Pex14 or for EGFP tagged with peroxisome-  
2 targeting signal 1 (PTS1) in the Pex3 KO MEFs (Fig. 1 B), indicating the  
3 successful depletion of peroxisomes in these cells.

4 With the use of our Pex3 KO MEFs, we then set out to identify  
5 mitochondrial phenotypes of peroxisome deficiency that could be rescued by  
6 reintroduction of peroxisomes. We examined mitochondrial morphology by  
7 observing the intracellular distribution of Tom20, a mitochondrial outer membrane  
8 protein, and ATP synthase  $\beta$ , a mitochondrial inner membrane protein, and found  
9 that the extent of mitochondrial fragmentation was increased in Pex3 KO MEFs  
10 (Fig. 1, C and D, Fig. S2 A). Huygens-based quantification indicated that the size  
11 of mitochondria was significantly smaller in Pex3-deficient MEFs than that in  
12 control MEFs (Fig. S2 B). The length of mitochondria also became shorter in  
13 Pex3-deficient MEFs compared to that in control MEFs (Fig. S2 C). We then  
14 asked whether restoration of Pex3 expression in these Pex3-deficient cells would  
15 rescue this mitochondrial phenotype. Infection of Pex3 KO MEFs with a retrovirus  
16 encoding Pex3 increased the abundance of Pex3 protein and induced the  
17 formation of peroxisomes (Fig. 1, E and F). Importantly, this reintroduction of  
18 Pex3 resulted in elongation of mitochondria in the Pex3-deficient MEFs (Fig. 1,  
19 G and H), indicating that Pex3 suppresses mitochondrial fragmentation in a  
20 reversible manner.

21

## 22 **Induction of mitochondrial fragmentation by *Pex5* deletion**

23 Given that the effect of *Pex3* deletion on mitochondrial morphology might have  
24 been the result of a Pex3-specific function unrelated to peroxisome formation, we



1 examined whether deletion of a different Pex gene, *Pex5*, might confer a similar  
2 phenotype. Deletion of *Pex5* would be expected to result in loss of peroxisomal  
3 matrix proteins but retention of the peroxisomal membrane, whereas that of *Pex3*  
4 results in the complete loss of peroxisomes. To disrupt *Pex5* in MEFs, we  
5 adopted the CRISPR-Cas9 system with a gRNA targeted to *Pex5* (Fig. S3 A). We  
6 confirmed disruption of *Pex5* gene (Fig. S3 B) as well as the loss of Pex5 protein  
7 (Fig. 2 A) in the targeted cells. Examination of mitochondrial morphology revealed  
8 that the extent of mitochondrial fragmentation was increased in the Pex5-deficient  
9 MEFs compared with control (WT) MEFs (Fig. 2, B and C). Furthermore, this  
10 phenotype of Pex5 deficiency was rescued by retrovirus-mediated restoration of  
11 Pex5 expression (Fig. 2, D–F). These results thus provided further support for the  
12 notion that peroxisomes suppress mitochondrial fragmentation.

13

#### 14 **Induction of mitochondrial elongation by a peroxisome proliferator**

15 We next examined whether an increase (rather than a decrease) in the number  
16 of peroxisomes might also affect mitochondrial morphology. We thus exposed  
17 MEFs to 4-phenylbutyrate (4-PBA), an inducer of peroxisome proliferation. We  
18 confirmed that 4-PBA increased the abundance of peroxisomes, as detected by  
19 immunostaining of Pex14, in control MEFs (Fig. 3 A). Furthermore, we found that  
20 4-PBA induced mitochondrial elongation in these cells (Fig. 3, A, C, and D).  
21 Importantly, however, 4-PBA did not induce mitochondrial elongation or suppress  
22 mitochondrial fragmentation in Pex3 KO MEFs (Fig. 3, B, C, and E), suggesting  
23 that the induction of mitochondrial elongation by 4-PBA requires peroxisomes.

1 Together, these results indicated that peroxisome abundance is a critical  
2 determinant of mitochondrial fission-fusion dynamics.

3

#### 4 **Induction of cytochrome c diffusion by deletion of *Pex3***

5 Given the mitochondrial fragmentation apparent in peroxisome-deficient cells, we  
6 next examined mitochondrial structure in more detail by electron micrography  
7 (EM). Mitochondria were indeed smaller and shorter in *Pex3* KO MEFs compared  
8 with control MEFs (Fig. 4, A–C), consistent with the results of confocal  
9 fluorescence microscopy (Fig. 1, C and D). The structure of cristae also appeared  
10 to have collapsed, with the presence of an indistinct and irregular inner  
11 membrane, in *Pex3*-deficient MEFs (Fig. 4 D), similar to the morphology  
12 previously observed in *Pex5*-deficient hepatocytes (Baumgart et al., 2001;  
13 Peeters et al., 2015).

14         Given that mitochondrial fragmentation and collapsed cristae are  
15 associated with the release of cytochrome *c* from these organelles and the  
16 intrinsic (mitochondrion-dependent) pathway of apoptosis (Otera et al., 2016;  
17 Suen et al., 2008), we examined whether *Pex3* deletion might affect the  
18 distribution of cytochrome *c*. Whereas cytochrome *c* immunoreactivity was  
19 detected almost exclusively in mitochondria of control MEFs, as shown by its  
20 overlap with that of Tom20, cytochrome *c* signals were diffusely distributed in the  
21 cytosol in addition to their punctate mitochondrial distribution in *Pex3* KO MEFs  
22 (Fig. 4, E and F). A high cell density appeared to further increase the amount of  
23 cytochrome *c* in the cytosol of *Pex3*-deficient cells (Fig. S4). Quantitative analysis  
24 revealed that the colocalization of cytochrome *c* with Tom20, as reflected by

1 Pearson's correlation coefficient ( $r$ ), was significantly reduced in Pex3 KO MEFs  
2 compared with control MEFs (Fig. 4 G), indicating that *Pex3* deletion indeed  
3 induced the diffusion of cytochrome *c*. Importantly, forced expression of Pex3  
4 was sufficient to restore the normal (mitochondrial) distribution of cytochrome *c*  
5 in Pex3 KO MEFs (Fig. 4, H–J). Together, these results thus showed that Pex3  
6 suppresses the diffusion of cytochrome *c*.

7

### 8 **Induction of cytochrome *c* diffusion by deletion of *Pex5***

9 We then examined whether deletion of *Pex5* results in a similar redistribution of  
10 cytochrome *c*. Cytochrome *c* signals were indeed found to be diffusely distributed  
11 in the cytosol of Pex5 KO MEFs (Fig. 5, A and B). We also confirmed that forced  
12 expression of Pex5 restored the mitochondrial localization of cytochrome *c* in the  
13 Pex5-deficient cells (Fig. 5, C and D). Together, our results thus indicated that  
14 functional peroxisomes, which require both Pex3 and Pex5, are necessary for  
15 suppression of cytochrome *c* diffusion.

16

### 17 ***Pex3* deletion without an overt change in ROS and respiration levels**

18 We next addressed the mechanism by which the diffusion of cytochrome *c* is  
19 increased in peroxisome-deficient MEFs. Although previous studies have shown  
20 that long-term deletion of *Pex* genes results in ROS accumulation (Bülow et al.  
21 2018, Rahim et al. 2016), the cytosolic ROS level of our Pex3-deficient MEFs as  
22 measured with CellROX did not appear to differ from that of control MEFs (Fig. 6,  
23 A and B). Under the same condition, the treatment of these MEFs with tert-  
24 butylhydroperoxide (TBHP), a ROS inducer, increased CellROX signals (Fig. 6,

1 A and B). Moreover, control and Pex3-deficient MEFs did not show a detectable  
2 difference in mitochondrial ROS levels monitored by MitoSOX (Fig. 6, C and D).  
3 These results suggest that (relatively acute) *Pex3* deletion did not overtly  
4 increase ROS levels in mitochondria or the cytosol of our cultured MEFs. We also  
5 examined the rate of oxygen consumption in these cells, given that the  
6 abundance and activity of OXPHOS components are reduced after the deletion  
7 of *Pex* genes (Peeters et al., 2015). We again found, however, that control and  
8 Pex3-deficient MEFs did not differ significantly in their basal or ATP-linked rates  
9 of oxygen consumption (Fig. 6, E and F), suggesting that the mitochondrial  
10 OXPHOS system remains intact after *Pex3* deletion in MEFs. Considering that  
11 we did not observe overt ROS accumulation or altered oxygen consumption in  
12 these cells, it was unlikely that an increase in ROS levels was responsible for the  
13 induction of cytochrome *c* diffusion. Indeed, treatment of Pex3 KO MEFs with the  
14 ROS scavenger *N*-acetylcysteine (NAC) did not suppress mitochondrial  
15 fragmentation or cytochrome *c* diffusion, whereas such treatment did attenuate  
16 the TBHP-induced increase in CellROX signal intensity (Fig. S5).

17

### 18 **Promotion of Drp1 association with mitochondria by deletion of *Pex3***

19 Given that Drp1 plays a pivotal role in mitochondrial fragmentation (fission) and  
20 cytochrome *c* release (Estaquier and Arnoult, 2007; Otera et al., 2016) and that  
21 Drp1 localizes not only to mitochondria but also to peroxisomes (Tanaka et al.,  
22 2006; Waterham et al., 2007), we examined whether *Pex3* deletion affects the  
23 abundance or subcellular localization of Drp1. Immunofluorescence analysis  
24 showed that the amounts of Drp1 both in the cytosol and associated with

1 mitochondria appeared to increase in Pex3 KO MEFs compared with control  
2 MEFs (Fig. 7 A). Importantly, the extent of colocalization of Drp1 with Tom20 was  
3 significantly higher in Pex3-deficient MEFs than in control cells (Fig. 7 B),  
4 indicating that Pex3 ablation results in an increased localization of Drp1 to  
5 mitochondria.

6 To examine whether Drp1 is responsible for the mitochondrial  
7 fragmentation and cytochrome *c* diffusion observed in Pex3 KO MEFs, we  
8 suppressed the function of Drp1 by introducing a catalytically inactive mutant  
9 (K38A) of the protein that has been shown to act in a dominant negative manner  
10 (Frank et al., 2001). Expression of Drp1(K38A) indeed both restored the  
11 elongated morphology of mitochondria and attenuated cytochrome *c* diffusion in  
12 Pex3-deficient MEFs (Fig. 7 C–E). Together, these results thus suggested that  
13 *Pex3* deletion induces mitochondrial fragmentation and cytochrome *c* diffusion by  
14 promoting the localization of Drp1 to mitochondria.

15

### 16 **Caspase activation and enhanced stress-induced apoptosis in Pex3-** 17 **deficient cells**

18 The release of cytochrome *c* from mitochondria triggers activation of the Apaf-1–  
19 caspase-9 complex (apoptosome) and caspase-3 and thereby induces apoptosis  
20 (Hyman and Yuan, 2012). We therefore examined the effect of *Pex3* deletion on  
21 caspase activity and found that the levels of the cleaved forms of caspase-9 and  
22 caspase-3 were increased in Pex3 KO MEFs compared with control MEFs (Fig.  
23 8, A and B). These results thus suggested that Pex3 suppresses the activation of  
24 caspase-9 and caspase-3 under basal conditions in MEFs. In contrast, we did not

1 detect any significant difference in the fraction of annexin V–positive (apoptotic)  
2 cells between control and Pex3-deficient MEFs (Fig. 8, C and D), suggesting that  
3 caspase activation induced by *Pex3* deletion is not sufficient to trigger apoptosis.

4 We hypothesized that the elevated basal activity of caspases in Pex3 KO  
5 MEFs might increase the vulnerability of these cells to cellular stressors. To test  
6 this notion, we treated peroxisome-deficient cells with the DNA-damaging agent  
7 etoposide. Both Pex3-deficient MEFs and Pex5-deficient MEFs manifested  
8 increased levels of caspase-3 activation in response to etoposide treatment  
9 compared with the corresponding control MEFs (Fig. 8, E and F). Furthermore,  
10 annexin V staining revealed that Pex3 KO MEFs underwent apoptosis to a  
11 significantly greater extent than did control MEFs in response to etoposide  
12 treatment (Fig. 8, G and H). These results thus suggested that peroxisomes  
13 prevent excessive caspase activity and the induction of apoptosis, and that they  
14 thereby increase the resistance of cells to cellular stress such as that associated  
15 with DNA damage.

16

## 17 **Discussion**

18 Although the cooperation between peroxisomes and mitochondria with regard to  
19 cellular metabolism has been extensively studied, the possible contribution of  
20 peroxisomes to mitochondrial fission-fusion dynamics has remained largely  
21 unknown. Our results now show that peroxisomes play a key role in determination  
22 of the balance between mitochondrial fission and fusion, with this balance being  
23 essential for a wide range of biological processes including cellular  
24 responsiveness to stressors (Detmer and Chan, 2007; Khacho et al., 2016; Weir

1 et al., 2017). Indeed, our data also show that peroxisomes are important for  
2 protection of cells from mitochondrion-dependent apoptosis in response to DNA  
3 damage. Our study therefore provides a new basis for understanding the function  
4 of peroxisomes.

5 We found that the loss of peroxisomes induced the fragmentation of  
6 mitochondria, whereas some previous studies showed that the loss of  
7 peroxisomes promoted the enlargement of mitochondria (Bülow et al., 2018;  
8 Rahim et al., 2016). This difference may be attributable to the long-term ablation  
9 of peroxins in these previous studies, which likely resulted in secondary effects  
10 due to the accumulation of ROS and subsequent cellular damage. In the present  
11 study, we took advantage of a MEF culture in which the intracellular ROS level  
12 was not greatly increased after peroxin ablation and found that the mitochondrial  
13 fragmentation and cytochrome *c* diffusion induced by peroxin gene deletion were  
14 rescued by restoration of peroxin expression, indicating that these phenomena  
15 are primary effects of peroxisomal loss.

16 The mechanism responsible for peroxisome-mediated regulation of  
17 mitochondrial fission-fusion dynamics remains unknown. Given that the fission  
18 and fusion machineries of both organelles share components such as Drp1 and  
19 Fis1 in mammalian cells (Schrader, 2006; Tanaka et al., 2006; Waterham et al.,  
20 2007), peroxisomes and mitochondria may compete for these components.  
21 Indeed, we found that *Pex3* deletion increased Drp1 localization to mitochondria  
22 and that inhibition of Drp1 rescued mitochondrial fragmentation in *Pex3* KO MEFs.  
23 These results thus implicate Drp1 function involved in the peroxisome-mediated  
24 regulation of mitochondrial dynamics. Several studies have also shown that

1 peroxisomes are located adjacent to MAMs, which are described as  
2 mitochondrial constriction sites (Cohen et al., 2014; Friedman et al., 2011; Horner  
3 et al., 2011; Mattiazzi Usaj et al., 2015). Given that peroxisomes also make  
4 physical contact with mitochondria (Fransen et al., 2017), these observations  
5 raise the possibility that peroxisomes compete with ER for mitochondrial contact  
6 sites. Whether peroxisomes actually regulate MAM formation warrants future  
7 study. Furthermore, a recent study showed that lysosomes also make contacts  
8 with mitochondria and regulate mitochondrial fission (Wong et al., 2018). Indeed,  
9 >80% of mitochondrial fission sites were found to contact lysosomes, whereas  
10 <20% of such sites contacted peroxisomes. Peroxisome-mitochondrion contacts  
11 may thus hamper or promote the interaction between lysosomes and  
12 mitochondria, resulting in modulation of the mitochondrial fission process.  
13 Together, these previous and present observations reveal multiple types of  
14 interorganellar communication that coordinately regulate mitochondrial fission-  
15 fusion dynamics.

16 In this study, we propose that Drp1 mediates mitochondrial fragmentation  
17 and subsequent cytochrome *c* diffusion in peroxisome-deficient cells. However,  
18 it remains unknown what molecular mechanism underlies cytochrome *c* diffusion  
19 after Drp1-mediated mitochondrial fragmentation in peroxisome-deficient cells.  
20 One possibility is that peroxisomes compete with mitochondria for some  
21 components necessary for cytochrome *c* diffusion. Cytochrome *c* is known to be  
22 released through the pore composed of the Bcl-2 family members BAX and BAK  
23 at the outer membrane of mitochondria (Tait and Green, 2010). Intriguingly, Fujiki  
24 and colleagues reported that a fraction of BAK also localizes to peroxisomes



1 (Hosoi et al., 2017). Elimination of peroxisomes may thus alter BAK's localization  
2 from peroxisomes to mitochondria, and the increased mitochondrial BAK may  
3 thereby facilitate cytochrome *c* diffusion in peroxisome-deficient cells. It would be  
4 important to test the notion that molecules shared by mitochondria and  
5 peroxisomes mediate their interorganellar communications.

6 Our results revealed not only the fragmentation of mitochondria in  
7 response to the loss of peroxisomes, but also the elongation of mitochondria in  
8 response to treatment of cells with the peroxisome proliferator 4-PBA. These  
9 findings suggest that peroxisomal abundance is an important determinant of  
10 mitochondrial dynamics. Cellular conditions that affect the abundance of  
11 peroxisomes might thus also influence mitochondrial dynamics through  
12 peroxisomes. In this regard, cellular stressors such as UV light exposure and  
13 elevated ROS levels increase the number of peroxisomes in both plant and  
14 mammalian cells (Schrader and Fahimi, 2006). This increase in peroxisomal  
15 number or abundance may thus contribute to a protective response to allow cells  
16 to cope with stress via suppression of mitochondrial fragmentation and caspase  
17 activation. Such a notion is consistent with our present results showing that  
18 peroxisomes reduce cellular sensitivity to toxic insults.

19 Fatty acids, such as oleic acid, and a high-fat diet are also thought to  
20 increase the abundance of peroxisomes (Diano et al., 2011; Ishii et al., 1980;  
21 Lock et al., 1989; Reddy and Mannaerts, 1994; Veenhuis et al., 1987). It would  
22 thus be of interest to determine whether the high level of fatty acid synthesis  
23 apparent in adult neural stem-progenitor cells (Knobloch et al., 2013) confers  
24 resistance to cellular stress through an increase in the number of peroxisomes.

1 Indeed, the abundance of peroxisomes is known to be high in radial glia cells  
2 preserved for a long period and to be reduced by aging (Ahlemeyer et al., 2007),  
3 with such changes possibly having consequences for mitochondrial regulation in  
4 these cells.

5 Mitochondrion-dependent activation of caspases contributes not only to  
6 removal of unnecessary cells during development or damaged cells exposed to  
7 stress stimuli but also to regulation of tissue stem cell differentiation and terminal  
8 differentiation of myoblasts, erythroblasts, and keratinocytes (Hollville and  
9 Deshmukh, 2017). Furthermore, nonapoptotic caspase activation plays a key  
10 regulatory role in the pruning of neurites and the formation and maturation of  
11 neural circuits in the nervous system (Unsain and Barker, 2015). For example,  
12 caspase-9 is necessary for axon pruning in dorsal root ganglion neurons and  
13 cervical sympathetic neurons (Cusack et al., 2013; Simon et al., 2012).  
14 Nonapoptotic caspase activation is also implicated in regulation of the  
15 internalization of AMPA-sensitive glutamate receptors, which contributes to long-  
16 term depression in hippocampal neurons (Li et al., 2010). Nonapoptotic activation  
17 of caspases is thus essential for the control of various cellular processes. The  
18 activation of caspases at a sublethal level in peroxisome-deficient cells observed  
19 in the present study suggests that peroxisomes limit caspase activation under  
20 low-stress conditions. It will be of interest to examine the possible role of  
21 peroxisomes in various biological processes that require nonapoptotic caspase  
22 activation.

23 Individuals with Zellweger syndrome and peroxin-deficient mice manifest  
24 severe defects in various organs including the brain, bone, muscle, kidney and

1 liver. The mechanisms underlying this broad range of abnormalities remain  
2 unknown, however. Dysfunction of the mitochondrial fusion machinery also gives  
3 rise to neurodegenerative diseases, muscle atrophy, and osteogenic  
4 abnormalities (Chen et al., 2010; Detmer and Chan, 2007; Romanello et al., 2010;  
5 Touvier et al., 2015). Degeneration of Purkinje cells, one of the most prominent  
6 features of patients with Zellweger syndrome (Barry and O'Keeffe, 2013;  
7 Trompier et al., 2014), is thus also observed in mice with Purkinje cell-specific  
8 deficiency of Mfn2 (Chen et al., 2007). The peroxisome-dependent regulation of  
9 mitochondria uncovered in the present study therefore raises the possibility that  
10 excessive mitochondrial fragmentation plays a causal role in the pathogenesis of  
11 Zellweger syndrome. If so, our findings may provide a basis for the development  
12 of new therapies for this lethal disease.

13

14

## 15 **Materials and methods**

16

### 17 **Immunoblot analysis**

18 Immunoblot analysis was performed as described previously (Okazaki et al.,  
19 2013). Immune complexes were detected with a chemiluminescence reagent  
20 [100 mM Tris-HCl (pH 8.5), 1.25 mM luminol, 0.2 mM coumaric acid, 0.009%  
21 H<sub>2</sub>O<sub>2</sub>] and an Image Quant LAS4000 instrument (GE Healthcare). Blot intensities  
22 were measured with Image J software.

23

### 24 **Immunofluorescence microscopy**

1 Cells were fixed with 4% formaldehyde for 10 minutes at 37°C, permeabilized  
2 with 0.2% Triton X-100 in PBS for 5 minutes, and incubated for 30 minutes in  
3 PBS containing 2% FBS and 2% BSA (blocking buffer). They were then exposed  
4 first for 24 hours at 4°C to primary antibodies in blocking buffer and then for 1  
5 hour at room temperature to Alexa Fluor–conjugated secondary antibodies  
6 (Thermo Fisher Scientific) and Hoechst 33342 in blocking buffer. Moviol were  
7 used as mounting medium. Images were acquired with a TCS SP5 confocal  
8 microscope (Leica) and were processed with Photoshop CS software (Adobe).  
9 Pearson’s correlation coefficient ( $r$ ) for the colocalization of Tom20 and  
10 cytochrome c as well as Manders’ M1 coefficient for the colocalization of Tom20  
11 and Drp1 were calculated with Coloc 2 of Fiji.

12

### 13 **Morphological quantification of mitochondria**

14 In Figure S2, samples were prepared in the same way as in the  
15 immunofluorescence experiments, except that ProLong Diamond were used as  
16 mounting medium. Images were deconvoluted in Huygens software (Scientific  
17 Volume Imaging). After the deconvolution process, voxels and length of  
18 mitochondria were calculated with object analyzer, Huygens. 35 and 30 images  
19 for Control and Pex3 KO MEFs respectively, from three independent experiment  
20 were analyzed in this quantification.

21

### 22 **EM**

23 Cells were fixed in 0.1 M phosphate buffer (pH 7.2) containing 2% glutaraldehyde  
24 and 2% paraformaldehyde, exposed to 1% OsO<sub>4</sub>, dehydrated, and embedded in

1 Epon 812. Ultrathin sections (60 nm) were cut with an ultramicrotome (UC6, Leica  
2 Microsystems), stained with uranyl acetate and lead citrate, and examined with a  
3 Hitachi HT7700 electron microscope. The area and major axis of mitochondria in  
4 images were measured with the use of Fiji software.

5

#### 6 **Measurement of ROS**

7 Cells were incubated with 5  $\mu$ M MitoSOX or 500 nM CellROX for 30 minutes at  
8 37°C, isolated by exposure to trypsin, and resuspended in PBS containing 3%  
9 FBS for analysis with a FACSAria flow cytometer (BD Biosciences).

10

#### 11 **Measurement of oxygen consumption rate**

12 The oxygen consumption rate (OCR) of cells was measured with the use of a  
13 Seahorse XF24 Extracellular Flux Analyzer (Seahorse Biosciences). Cells were  
14 plated in 24-well Seahorse plates and cultured overnight, after which the medium  
15 was replaced with Seahorse XF Base medium supplemented with 10 mM glucose,  
16 1 mM pyruvate, and GlutaMAX (2 ml/liter, Thermo Fisher Scientific). The cells  
17 were placed in a 37°C incubator without CO<sub>2</sub> before loading into the analyzer.  
18 After measurement of basal respiration, the cells were exposed to 1  $\mu$ M  
19 oligomycin to measure the proton leak, to 1  $\mu$ M carbonylcyanide m-  
20 chlorophenylhydrazone (CCCP) to measure the maximal OCR, and to 0.5  $\mu$ M  
21 rotenone and 0.5  $\mu$ M antimycin A to measure the nonmitochondrial OCR. The  
22 ATP-linked OCR was calculated by a subtraction proton leak from basal OCR.  
23 Cells plated simultaneously in 96-well plates were counted to normalize OCR  
24 values.

1

## 2 **Annexin V binding assay**

3 Cells were stained with Cy5-coupled annexin V (Promokine) according to the  
4 manufacturer's instructions. Flow cytometric analysis of the stained cells was  
5 performed with a FACSAria flow cytometer (BD Biosciences).

6

## 7 **Cell culture and transfection**

8 MEFs and Plat-E cells (Morita et al., 2000) were maintained in DMEM  
9 supplemented with 10% FBS and 1% penicillin-streptomycin. Plat-E cells were  
10 transfected with the use of the GeneJuice Transfection Reagent (Merck Millipore),  
11 whereas transfection of MEFs was performed with Lipofectamine 2000 or with  
12 Lipofectamine and PLUS Reagents (Thermo Fisher Scientific).

13

## 14 **Deletion of *Pex3***

15 C57BL/6 mice harboring the *Pex3*<sup>tm3a(EUCOMM)Wtsi</sup> allele obtained from the EUCOMM  
16 (European Conditional Mouse Mutagenesis Program) consortium were crossed  
17 with *Act-FLP* transgenic mice (Kono et al., 2017) to remove the FRT-flanked  
18 region and subsequently with *Rosa-CreER*<sup>T2</sup> transgenic mice (obtained from the  
19 U.S. National Cancer Institute) (Fig. S1). Mice heterozygous for the floxed allele  
20 of *Pex3* were mated, and the resulting homozygous embryos were isolated for  
21 preparation of MEFs. The MEFs were immortalized by the introduction of SV40  
22 large T antigen as described previously (Ando et al., 2000), and they were then  
23 treated with 1 nM 4-hydroxytamoxifen to remove the loxP-flanked region.

1 Immortalized MEFs treated with ethanol vehicle instead of 4-hydroxytamoxifen  
2 were prepared as control cells.

3

#### 4 **Deletion of *Pex5***

5 3T3 MEFs (kindly provided by H. Ichijo) were transfected with the KO vector (see  
6 Plasmids below) and were then sorted with a FACSAria flow cytometer (BD  
7 Biosciences) to obtain GFP-positive cells, which were seeded as single cells in a  
8 96-well plate.

9

#### 10 **Genomic PCR analysis**

11 For confirmation of *Pex5* deletion in MEFs, the cells were collected and lysed with  
12 genotyping buffer [50 mM KCl, 10 mM Tris-HCl (pH 8.3), 1.5 mM MgCl<sub>2</sub>, gelatin  
13 (0.1 mg/ml), 0.45 % NP-40, 0.45% Tween 20, proteinase K (500 µg/ml, Kanto  
14 Chemical)] or lysis buffer [1% SDS, 10 mM EDTA, 50 mM Tris-HCl (pH 8.1)] and  
15 were then incubated consecutively at 55°C for 3 hours and 98°C for 10 minutes.

16 The *Pex5* locus was amplified by PCR with the use of KOD FX Neo (Toyobo) and  
17 the forward and reverse primers 5'-  
18 TCCCTTCCCCCAGCCCACTCCGGGTGCCTC-3' and 5'-  
19 TCGGCGATGAATTCTTGGGACCAGTCGGTCTCATT-3', respectively. The  
20 PCR products were ligated into PCR-Blunt (Thermo Fisher Scientific) for  
21 sequencing by Eurofin Genomics.

22

#### 23 **Retrovirus-mediated expression of *Pex3* or *Pex5*, *Drp1*(K38A)**

1 Plat-E cells were transfected with pMXs-IG or either pMXs-Pex3-IG vector  
2 encoding human Pex3 or pMXs-Pex5S-IG vectors encoding Chinese hamster  
3 Pex5S, or pMXs-Drp1(K38A)-IG vector encoding rat Drp1(K38A) (Morita et al.,  
4 2000). After three days, the culture supernatants were harvested for isolation of  
5 retroviruses. Pex3 KO or Pex5 KO MEFs were infected with the corresponding  
6 peroxin retrovirus or the control virus, after which the cells were sorted with a  
7 FACSAria flow cytometer (BD Biosciences) to obtain GFP-positive cells. For  
8 preparing Drp1(K38A) infected cells, Pex3 KO MEFs were infected with the  
9 Drp1(K38A) retrovirus or the control virus and infected cells were sorted in the  
10 same way as above.

11

## 12 **Plasmids**

13 The plasmid pUcD2Hyg/EGFP-PTS1 was described previously (Tamura et al.,  
14 1998). Full-length cDNAs for human Pex3 or Chinese hamster Pex5S (His-  
15 CIPex5S-HA) (Ghaedi et al., 2000; Matsumura et al., 2000) were subcloned into  
16 the BamHI and XhoI sites of the pMXs-IG vector (kindly provided by T. Kitamura).  
17 The p3xFLAG-ratDrp1K38A plasmid encoding rat Drp1(K38A) was kindly  
18 provided by N. Ishihara. Full-length cDNAs for rat Drp1(K38A) were subcloned  
19 into the EcoRI and XhoI sites of the pMXs-IG vector. For generation of the  
20 CRISPR vector for *Pex5* deletion, a pair of oligonucleotides encoding the gRNA  
21 (forward, 5'-CACCGCTGGTCACCATGGCAATGC-3'; reverse, 5'-  
22 AAACGCATTGCCATGGTGACCAGC-3') was annealed and ligated into the  
23 px458 vector (Ran et al., 2013).

24



## 1 **Reagents**

2 NAC was obtained from Sigma-Aldrich. Etoposide, Hoechst 33342, a CellROX  
3 Green Flow Cytometry Assay Kit (including TBHP, NAC), ProLong Diamond, and  
4 MitoSOX Red Reagents were obtained from Thermo Fisher Scientific. Seahorse  
5 XF Cell Mito Stress Test Kit were obtained from Primetech. 4-PBA was obtained  
6 from Tocris.

7

## 8 **Antibodies**

9 Polyclonal and monoclonal antibodies to cleaved caspase-3 were obtained from  
10 Cell Signaling; antibodies to p38 and to Tom20 were from Santa Cruz  
11 Biotechnology; those to  $\alpha$ -tubulin were from Sigma; those to cytochrome c and to  
12 Drp1 were from BD Pharmingen; those to Pex14 were from Proteintech; those to  
13 Pex3 were from Atlas Antibodies; those to ATP synthase  $\beta$  were from Thermo  
14 Fisher Scientific; those to caspase-9 were from MBL Life Science; and those to  
15 Pex5 were described previously (Okumoto et al., 2014).

16

## 17 **Statistical analysis**

18 Quantitative data are presented as means  $\pm$  SEM and were compared with  
19 Scheffe's test or the unpaired Student's *t* test. A P value of  $<0.05$  was considered  
20 statistically significant.

21

22

## 23 **Acknowledgments**

1 We thank M. Okajima (Graduate School of Pharmaceutical Sciences, The  
2 University of Tokyo) for technical assistance, N. Ishihara (Institute of Life Science,  
3 Kurume University) and T. Kitamura (The institute of Medical Sciences, The  
4 University of Tokyo) for providing the plasmids, H. Ichijo (Graduate School of  
5 Pharmaceutical Sciences, The University of Tokyo) for providing the cells. We  
6 also appreciate our laboratory members for discussions.

7

8

### 9 **Competing interests**

10 The authors declare no competing financial interests.

11

12

### 13 **Funding**

14 This work was supported by a Grant-in-Aid from the Ministry of Education, Culture,  
15 Sports, Science, and Technology (MEXT) of Japan; by Core Research for  
16 Evolutionary Science and Technology of the Japan Science and Technology  
17 Agency; in part by research fellowships from the Japan Society for the Promotion  
18 of Science (JSPS) and the Global Centers of Excellence Program (Integrative  
19 Life Science Based on the Study of Biosignaling Mechanisms) of MEXT; by the  
20 Graduate Program for Leaders in Life Innovation, The University of Tokyo Life  
21 Innovation Leading Graduate School, of MEXT; and by JSPS KAKENHI grants  
22 JP16H05773, JP16H06280 and JP18J14098.

23

24

## 1 **References**

2

3 **Ahlemeyer, B., Neubert, I., Kovacs, W. J. and Baumgart-Vogt, E.** (2007). Differential  
4 expression of peroxisomal matrix and membrane proteins during postnatal development of mouse  
5 brain. *J Comp Neurol* **505**, 1-17.

6 **Ando, H., Kobayashi, M., Toda, S., Kikkawa, F., Masahashi, T. and Mizutani, S.** (2000).  
7 Establishment of a ciliated epithelial cell line from human Fallopian tube. *Hum Reprod* **15**, 1597-  
8 603.

9 **Baes, M., Gressens, P., Baumgart, E., Carmeliet, P., Casteels, M., Franssen, M., Evrard,**  
10 **P., Fahimi, D., Declercq, P. E., Collen, D. et al.** (1997). A mouse model for Zellweger syndrome.  
11 *Nat Genet* **17**, 49-57.

12 **Barry, D. S. and O'Keeffe, G. W.** (2013). Peroxisomes: the neuropathological  
13 consequences of peroxisomal dysfunction in the developing brain. *Int J Biochem Cell Biol* **45**,  
14 2012-5.

15 **Baumgart, E., Vanhorebeek, I., Grabenbauer, M., Borgers, M., Declercq, P. E., Fahimi,**  
16 **H. D. and Baes, M.** (2001). Mitochondrial alterations caused by defective peroxisomal biogenesis  
17 in a mouse model for Zellweger syndrome (PEX5 knockout mouse). *Am J Pathol* **159**, 1477-94.

18 **Bülow, M. H., Wingen, C., Senyilmaz, D., Gosejacob, D., Sociale, M., Bauer, R., Schulze,**  
19 **H., Sandhoff, K., Teleman, A. A., Hoch, M. et al.** (2018). Unbalanced lipolysis results in lipotoxicity  
20 and mitochondrial damage in peroxisome-deficient. *Mol Biol Cell* **29**, 396-407.

21 **Camões, F., Bonekamp, N. A., Delille, H. K. and Schrader, M.** (2009). Organelle  
22 dynamics and dysfunction: A closer link between peroxisomes and mitochondria. *J Inherit Metab*  
23 *Dis* **32**, 163-80.

24 **Chen, H., McCaffery, J. M. and Chan, D. C.** (2007). Mitochondrial fusion protects

- 1 against neurodegeneration in the cerebellum. *Cell* **130**, 548-62.
- 2 **Chen, H., Vermulst, M., Wang, Y. E., Chomyn, A., Prolla, T. A., McCaffery, J. M. and**
- 3 **Chan, D. C.** (2010). Mitochondrial fusion is required for mtDNA stability in skeletal muscle and
- 4 tolerance of mtDNA mutations. *Cell* **141**, 280-9.
- 5 **Cohen, Y., Klug, Y. A., Dimitrov, L., Erez, Z., Chuartzman, S. G., Elinger, D., Yofe, I.,**
- 6 **Soliman, K., Gärtner, J., Thoms, S. et al.** (2014). Peroxisomes are juxtaposed to strategic sites on
- 7 mitochondria. *Mol Biosyst* **10**, 1742-8.
- 8 **Cusack, C. L., Swahari, V., Hampton Henley, W., Michael Ramsey, J. and Deshmukh, M.**
- 9 (2013). Distinct pathways mediate axon degeneration during apoptosis and axon-specific pruning.
- 10 *Nat Commun* **4**, 1876.
- 11 **Delille, H. K., Alves, R. and Schrader, M.** (2009). Biogenesis of peroxisomes and
- 12 mitochondria: linked by division. *Histochem Cell Biol* **131**, 441-6.
- 13 **Detmer, S. A. and Chan, D. C.** (2007). Functions and dysfunctions of mitochondrial
- 14 dynamics. *Nat Rev Mol Cell Biol* **8**, 870-9.
- 15 **Diano, S., Liu, Z. W., Jeong, J. K., Dietrich, M. O., Ruan, H. B., Kim, E., Suyama, S.,**
- 16 **Kelly, K., Gyengesi, E., Arbiser, J. L. et al.** (2011). Peroxisome proliferation-associated control of
- 17 reactive oxygen species sets melanocortin tone and feeding in diet-induced obesity. *Nat Med* **17**,
- 18 1121-7.
- 19 **Dixit, E., Boulant, S., Zhang, Y., Lee, A. S., Odendall, C., Shum, B., Hacohen, N., Chen,**
- 20 **Z. J., Whelan, S. P., Fransen, M. et al.** (2010). Peroxisomes are signaling platforms for antiviral
- 21 innate immunity. *Cell* **141**, 668-81.
- 22 **Estaquier, J. and Arnoult, D.** (2007). Inhibiting Drp1-mediated mitochondrial fission
- 23 selectively prevents the release of cytochrome c during apoptosis. *Cell Death Differ* **14**, 1086-94.
- 24 **Frank, S., Gaume, B., Bergmann-Leitner, E. S., Leitner, W. W., Robert, E. G., Catez, F.,**

- 1 **Smith, C. L. and Youle, R. J.** (2001). The role of dynamin-related protein 1, a mediator of  
2 mitochondrial fission, in apoptosis. *Dev Cell* **1**, 515-25.
- 3 **Fransen, M., Lismont, C. and Walton, P.** (2017). The Peroxisome-Mitochondria  
4 Connection: How and Why? *Int J Mol Sci* **18**.
- 5 **Friedman, J. R., Lackner, L. L., West, M., DiBenedetto, J. R., Nunnari, J. and Voeltz, G.**  
6 **K.** (2011). ER tubules mark sites of mitochondrial division. *Science* **334**, 358-62.
- 7 **Fujiki, Y., Yagita, Y. and Matsuzaki, T.** (2012). Peroxisome biogenesis disorders:  
8 molecular basis for impaired peroxisomal membrane assembly: in metabolic functions and  
9 biogenesis of peroxisomes in health and disease. *Biochim Biophys Acta* **1822**, 1337-42.
- 10 **Ghaedi, K., Tamura, S., Okumoto, K., Matsuzono, Y. and Fujiki, Y.** (2000). The peroxin  
11 pex3p initiates membrane assembly in peroxisome biogenesis. *Mol Biol Cell* **11**, 2085-102.
- 12 **Goldfischer, S., Moore, C. L., Johnson, A. B., Spiro, A. J., Valsamis, M. P., Wisniewski,**  
13 **H. K., Ritch, R. H., Norton, W. T., Rapin, I. and Gartner, L. M.** (1973). Peroxisomal and  
14 mitochondrial defects in the cerebro-hepato-renal syndrome. *Science* **182**, 62-4.
- 15 **Hollville, E. and Deshmukh, M.** (2017). Physiological functions of non-apoptotic  
16 caspase activity in the nervous system. *Semin Cell Dev Biol*.
- 17 **Hoppins, S. and Nunnari, J.** (2012). Cell Biology. Mitochondrial dynamics and  
18 apoptosis--the ER connection. *Science* **337**, 1052-4.
- 19 **Horner, S. M., Liu, H. M., Park, H. S., Briley, J. and Gale, M.** (2011). Mitochondrial-  
20 associated endoplasmic reticulum membranes (MAM) form innate immune synapses and are  
21 targeted by hepatitis C virus. *Proc Natl Acad Sci U S A* **108**, 14590-5.
- 22 **Hosoi, K. I., Miyata, N., Mukai, S., Furuki, S., Okumoto, K., Cheng, E. H. and Fujiki, Y.**  
23 (2017). The VDAC2-BAK axis regulates peroxisomal membrane permeability. *J Cell Biol* **216**,  
24 709-722.

- 1           **Hyman, B. T. and Yuan, J.** (2012). Apoptotic and non-apoptotic roles of caspases in  
2 neuronal physiology and pathophysiology. *Nat Rev Neurosci* **13**, 395-406.
- 3           **Ishii, H., Fukumori, N., Horie, S. and Suga, T.** (1980). Effects of fat content in the diet  
4 on hepatic peroxisomes of the rat. *Biochim Biophys Acta* **617**, 1-11.
- 5           **Khacho, M., Clark, A., Svoboda, D. S., Azzi, J., MacLaurin, J. G., Meghaizel, C., Sesaki,**  
6 **H., Lagace, D. C., Germain, M., Harper, M. E. et al.** (2016). Mitochondrial Dynamics Impacts Stem  
7 Cell Identity and Fate Decisions by Regulating a Nuclear Transcriptional Program. *Cell Stem Cell*  
8 **19**, 232-247.
- 9           **Knobloch, M., Braun, S. M., Zurkirchen, L., von Schoutz, C., Zamboni, N., Araúzo-**  
10 **Bravo, M. J., Kovacs, W. J., Karalay, O., Suter, U., Machado, R. A. et al.** (2013). Metabolic control  
11 of adult neural stem cell activity by Fasn-dependent lipogenesis. *Nature* **493**, 226-30.
- 12           **Kobayashi, S., Tanaka, A. and Fujiki, Y.** (2007). Fis1, DLP1, and Pex11p coordinately  
13 regulate peroxisome morphogenesis. *Exp Cell Res* **313**, 1675-86.
- 14           **Kono, J., Konno, K., Talukder, A. H., Fuse, T., Abe, M., Uchida, K., Horio, S., Sakimura,**  
15 **K., Watanabe, M. and Itoi, K.** (2017). Distribution of corticotropin-releasing factor neurons in the  
16 mouse brain: a study using corticotropin-releasing factor-modified yellow fluorescent protein  
17 knock-in mouse. *Brain Struct Funct* **222**, 1705-1732.
- 18           **Lee, J. E., Westrate, L. M., Wu, H., Page, C. and Voeltz, G. K.** (2016). Multiple dynamin  
19 family members collaborate to drive mitochondrial division. *Nature* **540**, 139-143.
- 20           **Li, Z., Jo, J., Jia, J. M., Lo, S. C., Whitcomb, D. J., Jiao, S., Cho, K. and Sheng, M.** (2010).  
21 Caspase-3 activation via mitochondria is required for long-term depression and AMPA receptor  
22 internalization. *Cell* **141**, 859-71.
- 23           **Lismont, C., Nordgren, M., Van Veldhoven, P. P. and Fransen, M.** (2015). Redox  
24 interplay between mitochondria and peroxisomes. *Front Cell Dev Biol* **3**, 35.

1           **Lock, E. A., Mitchell, A. M. and Elcombe, C. R.** (1989). Biochemical mechanisms of  
2 induction of hepatic peroxisome proliferation. *Annu Rev Pharmacol Toxicol* **29**, 145-63.

3           **Matsumura, T., Otera, H. and Fujiki, Y.** (2000). Disruption of the interaction of the  
4 longer isoform of Pex5p, Pex5pL, with Pex7p abolishes peroxisome targeting signal type 2 protein  
5 import in mammals. Study with a novel Pex5-impaired Chinese hamster ovary cell mutant. *J Biol*  
6 *Chem* **275**, 21715-21.

7           **Mattiazzi Usaj, M., Brloznic, M., Kaferle, P., Zitnik, M., Wolinski, H., Leitner, F.,**  
8 **Kohlwein, S. D., Zupan, B. and Petrovic, U.** (2015). Genome-Wide Localization Study of Yeast  
9 Pex11 Identifies Peroxisome-Mitochondria Interactions through the ERMES Complex. *J Mol Biol*  
10 **427**, 2072-87.

11           **Maxwell, M., Bjorkman, J., Nguyen, T., Sharp, P., Finnie, J., Paterson, C., Tonks, I.,**  
12 **Paton, B. C., Kay, G. F. and Crane, D. I.** (2003). Pex13 inactivation in the mouse disrupts  
13 peroxisome biogenesis and leads to a Zellweger syndrome phenotype. *Mol Cell Biol* **23**, 5947-57.

14           **Morita, S., Kojima, T. and Kitamura, T.** (2000). Plat-E: an efficient and stable system  
15 for transient packaging of retroviruses. *Gene Ther* **7**, 1063-6.

16           **Muntau, A. C., Mayerhofer, P. U., Paton, B. C., Kammerer, S. and Roscher, A. A.** (2000).  
17 Defective peroxisome membrane synthesis due to mutations in human PEX3 causes Zellweger  
18 syndrome, complementation group G. *Am J Hum Genet* **67**, 967-75.

19           **Okazaki, T., Higuchi, M. and Gotoh, Y.** (2013). Mitochondrial localization of the  
20 antiviral signaling adaptor IPS-1 is important for its induction of caspase activation. *Genes Cells*  
21 **18**, 493-501.

22           **Okumoto, K., Noda, H. and Fujiki, Y.** (2014). Distinct modes of ubiquitination of  
23 peroxisome-targeting signal type 1 (PTS1) receptor Pex5p regulate PTS1 protein import. *J Biol*  
24 *Chem* **289**, 14089-108.

- 1           **Otera, H., Miyata, N., Kuge, O. and Mihara, K.** (2016). Drp1-dependent mitochondrial  
2 fission via MiD49/51 is essential for apoptotic cristae remodeling. *J Cell Biol* **212**, 531-44.
- 3           **Otera, H., Okumoto, K., Tateishi, K., Ikoma, Y., Matsuda, E., Nishimura, M., Tsukamoto,**  
4 **T., Osumi, T., Ohashi, K., Higuchi, O. et al.** (1998). Peroxisome targeting signal type 1 (PTS1)  
5 receptor is involved in import of both PTS1 and PTS2: studies with PEX5-defective CHO cell  
6 mutants. *Mol Cell Biol* **18**, 388-99.
- 7           **Peeters, A., Shinde, A. B., Dirkx, R., Smet, J., De Bock, K., Espeel, M., Vanhorebeek, I.,**  
8 **Vanlander, A., Van Coster, R., Carmeliet, P. et al.** (2015). Mitochondria in peroxisome-deficient  
9 hepatocytes exhibit impaired respiration, depleted DNA, and PGC-1  $\alpha$  independent proliferation.  
10 *Biochim Biophys Acta* **1853**, 285-98.
- 11           **Prudent, J., Zunino, R., Sugiura, A., Mattie, S., Shore, G. C. and McBride, H. M.** (2015).  
12 MAPL SUMOylation of Drp1 Stabilizes an ER/Mitochondrial Platform Required for Cell Death.  
13 *Mol Cell* **59**, 941-55.
- 14           **Rahim, R. S., Chen, M., Nourse, C. C., Meedeniya, A. C. and Crane, D. I.** (2016).  
15 Mitochondrial changes and oxidative stress in a mouse model of Zellweger syndrome  
16 neuropathogenesis. *Neuroscience* **334**, 201-213.
- 17           **Ran, F. A., Hsu, P. D., Wright, J., Agarwala, V., Scott, D. A. and Zhang, F.** (2013).  
18 Genome engineering using the CRISPR-Cas9 system. *Nat Protoc* **8**, 2281-2308.
- 19           **Reddy, J. K. and Mannaerts, G. P.** (1994). Peroxisomal lipid metabolism. *Annu Rev*  
20 *Nutr* **14**, 343-70.
- 21           **Romanello, V., Guadagnin, E., Gomes, L., Roder, I., Sandri, C., Petersen, Y., Milan, G.,**  
22 **Masiero, E., Del Piccolo, P., Foretz, M. et al.** (2010). Mitochondrial fission and remodelling  
23 contributes to muscle atrophy. *EMBO J* **29**, 1774-85.
- 24           **Salpietro, V., Phadke, R., Saggari, A., Hargreaves, I. P., Yates, R., Fokoloros, C., Mankad,**



- 1 **K., Hertecant, J., Ruggieri, M., McCormick, D. et al.** (2015). Zellweger syndrome and secondary  
2 mitochondrial myopathy. *Eur J Pediatr* **174**, 557-63.
- 3 **Schrader, M.** (2006). Shared components of mitochondrial and peroxisomal division.  
4 *Biochim Biophys Acta* **1763**, 531-41.
- 5 **Schrader, M. and Fahimi, H. D.** (2006). Peroxisomes and oxidative stress. *Biochim*  
6 *Biophys Acta* **1763**, 1755-66.
- 7 **Schrader, M. and Yoon, Y.** (2007). Mitochondria and peroxisomes: are the 'big brother'  
8 and the 'little sister' closer than assumed? *Bioessays* **29**, 1105-14.
- 9 **Simon, D. J., Weimer, R. M., McLaughlin, T., Kallop, D., Stanger, K., Yang, J., O'Leary,**  
10 **D. D., Hannoush, R. N. and Tessier-Lavigne, M.** (2012). A caspase cascade regulating  
11 developmental axon degeneration. *J Neurosci* **32**, 17540-53.
- 12 **Suen, D. F., Norris, K. L. and Youle, R. J.** (2008). Mitochondrial dynamics and apoptosis.  
13 *Genes Dev* **22**, 1577-90.
- 14 **Tait, S. W. and Green, D. R.** (2010). Mitochondria and cell death: outer membrane  
15 permeabilization and beyond. *Nat Rev Mol Cell Biol* **11**, 621-32.
- 16 **Tamura, S., Okumoto, K., Toyama, R., Shimozawa, N., Tsukamoto, T., Suzuki, Y., Osumi,**  
17 **T., Kondo, N. and Fujiki, Y.** (1998). Human PEX1 cloned by functional complementation on a  
18 CHO cell mutant is responsible for peroxisome-deficient Zellweger syndrome of complementation  
19 group I. *Proc Natl Acad Sci U S A* **95**, 4350-5.
- 20 **Tanaka, A., Kobayashi, S. and Fujiki, Y.** (2006). Peroxisome division is impaired in a  
21 CHO cell mutant with an inactivating point-mutation in dynamin-like protein 1 gene. *Exp Cell*  
22 *Res* **312**, 1671-84.
- 23 **Touvier, T., De Palma, C., Rigamonti, E., Scagliola, A., Incerti, E., Mazelin, L., Thomas,**  
24 **J. L., D'Antonio, M., Politi, L., Schaeffer, L. et al.** (2015). Muscle-specific Drp1 overexpression

- 1 impairs skeletal muscle growth via translational attenuation. *Cell Death Dis* **6**, e1663.
- 2 **Trompier, D., Vejux, A., Zarrouk, A., Gondcaille, C., Geillon, F., Nury, T., Savary, S. and**
- 3 **Lizard, G.** (2014). Brain peroxisomes. *Biochimie* **98**, 102-10.
- 4 **Unsain, N. and Barker, P. A.** (2015). New Views on the Misconstrued: Executioner
- 5 Caspases and Their Diverse Non-apoptotic Roles. *Neuron* **88**, 461-74.
- 6 **Veenhuis, M., Mateblowski, M., Kunau, W. H. and Harder, W.** (1987). Proliferation of
- 7 microbodies in *Saccharomyces cerevisiae*. *Yeast* **3**, 77-84.
- 8 **Wang, C. and Youle, R. J.** (2009). The role of mitochondria in apoptosis\*. *Annu Rev*
- 9 *Genet* **43**, 95-118.
- 10 **Waterham, H. R. and Ebberink, M. S.** (2012). Genetics and molecular basis of human
- 11 peroxisome biogenesis disorders. *Biochim Biophys Acta* **1822**, 1430-41.
- 12 **Waterham, H. R., Koster, J., van Roermund, C. W., Mooyer, P. A., Wanders, R. J. and**
- 13 **Leonard, J. V.** (2007). A lethal defect of mitochondrial and peroxisomal fission. *N Engl J Med* **356**,
- 14 1736-41.
- 15 **Weir, H. J., Yao, P., Huynh, F. K., Escoubas, C. C., Goncalves, R. L., Burkewitz, K., Laboy,**
- 16 **R., Hirschey, M. D. and Mair, W. B.** (2017). Dietary Restriction and AMPK Increase Lifespan via
- 17 Mitochondrial Network and Peroxisome Remodeling. *Cell Metab* **26**, 884-896.e5.
- 18 **Westermann, B.** (2010). Mitochondrial fusion and fission in cell life and death. *Nat Rev*
- 19 *Mol Cell Biol* **11**, 872-84.
- 20 **Wong, Y. C., Ysselstein, D. and Krainc, D.** (2018). Mitochondria-lysosome contacts
- 21 regulate mitochondrial fission via RAB7 GTP hydrolysis. *Nature* **554**, 382-386.
- 22 **Yang, Z., Zhao, X., Xu, J., Shang, W. and Tong, C.** (2018). A novel fluorescent reporter
- 23 detects plastic remodeling of mitochondria-ER contact sites. *J Cell Sci* **131**.
- 24

1  
2  
3  
4  
5  
6  
7  
8  
9  
10  
11  
12  
13  
14  
15  
16  
17  
18  
19  
20  
21  
22  
23  
24

1 Figure 1. **Deletion of *Pex3* induces mitochondrial fragmentation. (A)**  
2 Immunoblot analysis of control and *Pex3* KO MEFs with antibodies to *Pex3* and  
3 to p38 (loading control). Data are representative of three independent  
4 experiments. **(B)** Immunofluorescence staining of control and *Pex3* KO MEFs  
5 expressing EGFP-PTS1 with antibodies to *Pex14*. Nuclei were stained with  
6 Hoechst 33342. Scale bars, 20  $\mu$ m. Data are representative of three independent  
7 experiments. **(C)** Immunofluorescence staining of control and *Pex3* KO MEFs  
8 with antibodies to Tom20. The boxed regions in the upper panels are shown at  
9 higher magnification in the lower panels. Scale bars, 20  $\mu$ m. **(D)** Quantification of  
10 mitochondrial fragmentation in control and *Pex3* KO MEFs determined from  
11 images as in (C). Data are means  $\pm$  SEM from three independent experiments.  
12 \*\*\* $P < 0.005$  (unpaired Student's *t* test). **(E)** Immunoblot analysis of *Pex3* in *Pex3*  
13 KO MEFs infected with retroviruses encoding GFP either alone (pMXs-IG) or  
14 together with *Pex3* (pMXs-*Pex3*-IG). Data are representative of three  
15 independent experiments. **(F)** Cells as in (E) were subjected to  
16 immunofluorescence staining with antibodies to *Pex14*. Nuclei were stained with  
17 Hoechst 33342. Scale bars, 20  $\mu$ m. Data are representative of three independent  
18 experiments. **(G)** Cells as in (E) were subjected to immunofluorescence staining  
19 with antibodies to Tom20. The boxed regions in the upper panels are shown at  
20 higher magnification in the lower panels. Scale bars, 20  $\mu$ m. **(H)** Quantification of  
21 mitochondrial fragmentation in images similar to those in (G). Data are means  $\pm$   
22 SEM from three independent experiments. \* $P < 0.05$  (unpaired Student's *t* test).  
23

1 Figure 2. **Deletion of *Pex5* induces mitochondrial fragmentation. (A)**  
2 Immunoblot analysis of *Pex5* in control and *Pex5* KO MEFs. Data are  
3 representative of three independent experiments. **(B)** Immunofluorescence  
4 analysis of Tom20 in control and *Pex5* KO MEFs. The boxed regions in the upper  
5 panels are shown at higher magnification in the lower panels. Scale bars, 20  $\mu$ m.  
6 **(C)** Quantification of mitochondrial fragmentation in control and *Pex5* KO MEFs  
7 determined from images as in (B). Data are means  $\pm$  SEM from three  
8 independent experiments. \* $P < 0.05$  (unpaired Student's *t* test). **(D)** Immunoblot  
9 analysis of *Pex5* in *Pex5* KO MEFs infected with retroviruses encoding GFP  
10 either alone (pMXs-IG) or together with *Pex5S* (pMXs-*Pex5S*-IG). Data are  
11 representative of three independent experiments. **(E)** Immunofluorescence  
12 analysis of Tom20 in cells as in (D). The boxed regions in the upper panels are  
13 shown at higher magnification in the lower panels. Scale bars, 20  $\mu$ m. **(F)**  
14 Quantification of mitochondrial fragmentation in control and *Pex5* KO MEFs  
15 determined from images as in (E). Data are means  $\pm$  SEM from four independent  
16 experiments. \* $P < 0.05$  (unpaired Student's *t* test).

17

18 Figure 3. **The peroxisome proliferator 4-PBA induces mitochondrial**  
19 **elongation. (A)** Immunofluorescence staining of *Pex14* and ATP synthase  $\beta$   
20 (mitochondrial marker) in control MEFs cultured with or without 1 mM 4-PBA for  
21 48 hours. Nuclei were stained with Hoechst 33342. Scale bars, 20  $\mu$ m. **(B)**  
22 Quantification of mitochondrial elongation in control MEFs as in (A). Data are  
23 means  $\pm$  SEM for four independent experiments. \* $P < 0.05$  (unpaired Student's *t*  
24 test). **(C)** Immunofluorescence analysis of *Pex3* KO MEFs cultured and stained

1 as in (A). **(D)** Quantification of mitochondrial fragmentation in Pex3 KO MEFs as  
2 in (C). Data are means  $\pm$  SEM for four independent experiments. NS, unpaired  
3 Student's *t* test. **(E)** Summary of the quantification of mitochondrial morphology  
4 in control and Pex3 KO MEFs cultured with or without 1 mM 4-PBA for 48 hours.  
5  
6 **Figure 4. Deletion of Pex3 induces cytochrome c diffusion. (A)** EM of control  
7 and Pex3 KO MEFs. Scale bars, 1.0  $\mu$ m. **(B and C)** Quantification of  
8 mitochondrial area and major axis, respectively, in images similar to those in (A).  
9 Data are means  $\pm$  SEM for 21 cells of each genotype. \*\**P* < 0.01; \*\*\*\**P* < 0.001  
10 (unpaired Student's *t* test). **(D)** High-magnification electron micrographs of control  
11 and Pex3 KO MEFs. Scale bars, 250 nm. **(E)** Immunofluorescence staining of  
12 Tom20 and cytochrome *c* in control and Pex3 KO MEFs. Nuclei were stained with  
13 Hoechst 33342. Scale bars, 20  $\mu$ m. **(F)** Quantification of the cells with cytochrome  
14 *c* in the cytosol imaged as in (E). Data are means  $\pm$  SEM from three independent  
15 experiments. \*\*\*\**P* < 0.001 (unpaired Student's *t* test). **(G)** Colocalization of  
16 cytochrome *c* with Tom20 as reflected by Pearson's correlation coefficient (*r*) and  
17 determined from images as in (E). Data are means  $\pm$  SEM from three  
18 independent experiments. \**P* < 0.05 (unpaired Student's *t* test). **(H)**  
19 Immunofluorescence staining of Tom20 and cytochrome *c* in Pex3 KO MEFs  
20 infected with retroviruses encoding GFP either alone (pMXs-IG) or together with  
21 Pex3 (pMXs-Pex3-IG). Nuclei were stained with Hoechst 33342. Scale bars, 20  
22  $\mu$ m. **(I)** Quantification of the cells with cytochrome *c* in the cytosol imaged as in  
23 (H). Data are means  $\pm$  SEM from three independent experiments. \**P* < 0.05  
24 (unpaired Student's *t* test). **(J)** Colocalization of cytochrome *c* with Tom20 as

1 reflected by Pearson's correlation coefficient and determined from images as in  
2 (H). Data are means  $\pm$  SEM from three independent experiments. \*P < 0.05  
3 (unpaired Student's *t* test).

4

5 **Figure 5. Deletion of *Pex5* induces cytochrome *c* diffusion. (A)**

6 Immunofluorescence staining of Tom20 and cytochrome *c* in control and *Pex5*  
7 KO MEFs. Nuclei were stained with Hoechst 33342. The boxed regions in the  
8 upper panels are shown at higher magnification in the lower panels. Scale bars,  
9 20  $\mu$ m. **(B)** Quantification of the cells with cytochrome *c* in the cytosol imaged as  
10 in (A). Data are means  $\pm$  SEM for three independent experiments. \*P < 0.05  
11 (unpaired Student's *t* test). **(C)** Immunofluorescence staining of Tom20 and  
12 cytochrome *c* in *Pex5* KO MEFs infected with retroviruses encoding GFP either  
13 alone (pMXs-IG) or together with *Pex5S* (pMXs-*Pex5S*-IG). Nuclei were stained  
14 with Hoechst 33342. The boxed regions in the upper panels are shown at higher  
15 magnification in the lower panels. Scale bars, 20  $\mu$ m. **(D)** Quantification of the  
16 cells with cytochrome *c* in the cytosol imaged as in (C). Data are means  $\pm$  SEM  
17 from four independent experiments. \*P < 0.05 (unpaired Student's *t* test).

18

19 **Figure 6. *Pex3* deletion without overt changes in ROS and respiration levels.**

20 **(A)** Representative flow cytometric analysis of cytosolic ROS levels as detected  
21 by CellROX staining in control and *Pex3* KO MEFs incubated with or without 200  
22  $\mu$ M TBHP for 60 minutes. **(B)** Quantification of CellROX-positive cells as in (A).  
23 Data are means  $\pm$  SEM from three independent experiments. \*\*P < 0.01; NS, not  
24 significant (Scheffe's test). **(C)** Representative flow cytometric analysis of

1 mitochondrial ROS levels as detected by MitoSOX staining in control and Pex3  
2 KO MEFs. **(D)** Quantification of MitoSOX-positive cells as in (C). Data are means  
3  $\pm$  SEM from six independent experiments. NS, not significant (unpaired Student's  
4 *t* test). **(E)** Oxygen consumption rate (OCR) in control and Pex3 KO MEFs. Data  
5 are means  $\pm$  SEM of triplicates from a representative experiment. **(F)** Basal, ATP-  
6 linked, proton-leak (+oligomycin), maximal (+CCCP), and nonmitochondrial  
7 (Non-mito, +rotenone/antimycin A) OCR determined as in (E). Data are means  $\pm$   
8 SEM from three independent experiments. NS, not significant (unpaired  
9 Student's *t* test).

10

11 **Figure 7. Deletion of *Pex3* promotes the association of Drp1 with**  
12 **mitochondria. (A)** Immunofluorescence staining of Tom20 and Drp1 in control  
13 and Pex3 KO MEFs. Nuclei were stained with Hoechst 33342. Scale bars, 20  $\mu$ m.  
14 **(B)** Colocalization of Drp1 with Tom20 as reflected by Manders' M1 coefficient  
15 and determined from images as in (A). Data are means  $\pm$  SEM for five  
16 independent experiments. \**P* < 0.05 (unpaired Student's *t* test). **(C)**  
17 Immunofluorescence staining of Tom20 and cytochrome *c* in Pex3 KO MEFs  
18 infected with retroviruses encoding GFP either alone (pMXs-IG) or together with  
19 mutated Drp1 (Drp1(K38A)). Nuclei were stained with Hoechst 33342. Scale bars,  
20 20  $\mu$ m. Data are representative of three independent experiments. **(D)**  
21 Quantification of mitochondrial fragmentation in images similar to those in (C).  
22 Data are means  $\pm$  SEM from three independent experiments. \**P* < 0.05 (unpaired  
23 Student's *t* test). **(E)** Quantification of the cells with cytochrome *c* in the cytosol



1 imaged as in (C). Data are means  $\pm$  SEM from three independent experiments.

2 \*P < 0.05 (unpaired Student's *t* test).

3

4

5

6 **Figure 8. Deletion of *Pex3* induces caspase activation and enhances stress-**

7 **induced apoptosis. (A)** Immunoblot analysis of caspase-3 and caspase-9 in

8 control and *Pex3* KO MEFs. The pro and cleaved forms of the enzymes are

9 indicated. Black vertical lines indicate noncontiguous lanes. **(B)** Quantification of

10 the cleaved forms of caspase-3 and caspase-9 (normalized by p38) in blots

11 similar to those in (A). Data are means  $\pm$  SEM for three independent experiments.

12 \*P < 0.05, \*\*P < 0.01 (unpaired Student's *t* test). **(C)** Representative flow

13 cytometric analysis of Cy5-labeled annexin V staining for control and *Pex3* KO

14 MEFs. **(D)** Quantification of cells positive for annexin V–Cy5 staining as in (C).

15 Data are means  $\pm$  SEM from four independent experiments. NS, not significant

16 (unpaired Student's *t* test). **(E and F)** Immunoblot analysis of the cleaved form of

17 caspase-3 in control and either *Pex3* KO (E) or *Pex5* KO (F) MEFs that had been

18 incubated in the absence (–) or presence of etoposide at 2 (+) or 4 (++)  $\mu$ M for

19 24 hours. Either  $\alpha$ -tubulin or p38 was examined as a loading control. Black

20 vertical lines indicate noncontiguous lanes. Data are representative of three

21 independent experiments. **(G)** Representative flow cytometric analysis of annexin

22 V–Cy5 staining for control and *Pex3* KO MEFs that had been incubated for 24

23 hours with 2  $\mu$ M etoposide or DMSO vehicle. **(H)** Quantification of cells positive

24 for annexin V–Cy5 staining as in (G). Data are means  $\pm$  SEM from three

1 independent experiments. \*P < 0.05; NS, not significant (unpaired Student's *t*  
2 test).

3

4 Supplemental Figure S1. **Scheme for *Pex3* disruption.** The region of the *Pex3*  
5 locus spanning exons 3 to 5 for *Pex3*<sup>tm3a(EUCOMM)Wtsi</sup>, *Pex3*<sup>tm3c(EUCOMM)Wtsi</sup>, and  
6 *Pex3*<sup>tm3d(EUCOMM)Wtsi</sup> alleles. See Materials and methods for details.

7

8 Supplemental Figure S2. **Deletion of *Pex3* induces mitochondrial**  
9 **fragmentation. (A)** Deconvoluted Immunofluorescence images of control and  
10 *Pex3* KO MEFs with antibodies to Tom20 and ATP synthase  $\beta$ . Scale bars, 20  
11  $\mu$ m. **(B)** Quantification of mitochondrial volume with object analyzer, Huygens and  
12 determined from imaged as in (A). Data are means  $\pm$  SEM from 35 cells in control  
13 MEFs and 30 cells in *Pex3* KO MEFs from three independent experiments. \*P <  
14 0.05; \*\*\*\*P < 0.001 (unpaired Student's *t* test). **(C)** Quantification of mitochondrial  
15 length with object analyzer, Huygens and determined from imaged as in (A). Data  
16 are means  $\pm$  SEM from 35 cells in control MEFs and 30 cells in *Pex3* KO MEFs  
17 from three independent experiments. \*\*\*P < 0.005; \*\*\*\*P < 0.001 (unpaired  
18 Student's *t* test).

19

20 Supplemental Figure S3. **Indel of *Pex5* induced with the CRISPR-Cas9 system.**

21 **(A)** Schematic representation of the targeting *Pex5* with a gRNA. The gRNA  
22 sequence is shown in yellow, protospacer adjacent motif (PAM) in blue, and start  
23 codon in red. **(B)** Sequencing of *Pex5* genomic DNA from *Pex5* KO MEFs.

1 Insertion or replacement of nucleotides is shown in green. The start codon is  
2 presented in red.

3

4 Supplemental Figure S4. **A high cell density enhances cytochrome c**  
5 **diffusion of Pex3 KO MEFs.** Pex3 KO MEFs seeded at low or high cell densities  
6 were subjected to immunofluorescence staining of Tom20 and cytochrome *c*.  
7 Nuclei were stained with Hoechst 33342. Data are representative of three  
8 independent experiments. Scale bars, 40  $\mu\text{m}$ .

9

10 Supplemental Figure S5. **Mitochondrial fragmentation and cytochrome c**  
11 **diffusion are not mediated by ROS in Pex3 KO MEFs. (A)** Flow cytometric  
12 analysis of cytosolic ROS as detected by CellROX staining in Pex3 KO MEFs  
13 incubated with or without 5 mM NAC for 1 hour and then in the additional absence  
14 or presence of 200  $\mu\text{M}$  TBHP for 1 hour. Data are representative of three  
15 independent experiments. **(B)** Immunofluorescence staining of Tom20 and  
16 cytochrome *c* in Pex3 KO MEFs incubated with or without 5 mM NAC for 6 hours.  
17 Nuclei were also stained with Hoechst 33342. Scale bars, 20  $\mu\text{m}$ . **(C and D)**  
18 Quantification of mitochondrial fragmentation and the diffusion of cytochrome *c*  
19 into the cytosol, respectively, for images similar to those in (B). Data are means  
20  $\pm$  SEM for three independent experiments. NS, not significant (unpaired Student's  
21 *t* test).

22

# Figure 1

bioRxiv preprint doi: <https://doi.org/10.1101/407098>; this version posted September 3, 2018. The copyright holder for this preprint (which was not certified by peer review) is the author/funder. All rights reserved. No reuse allowed without permission.

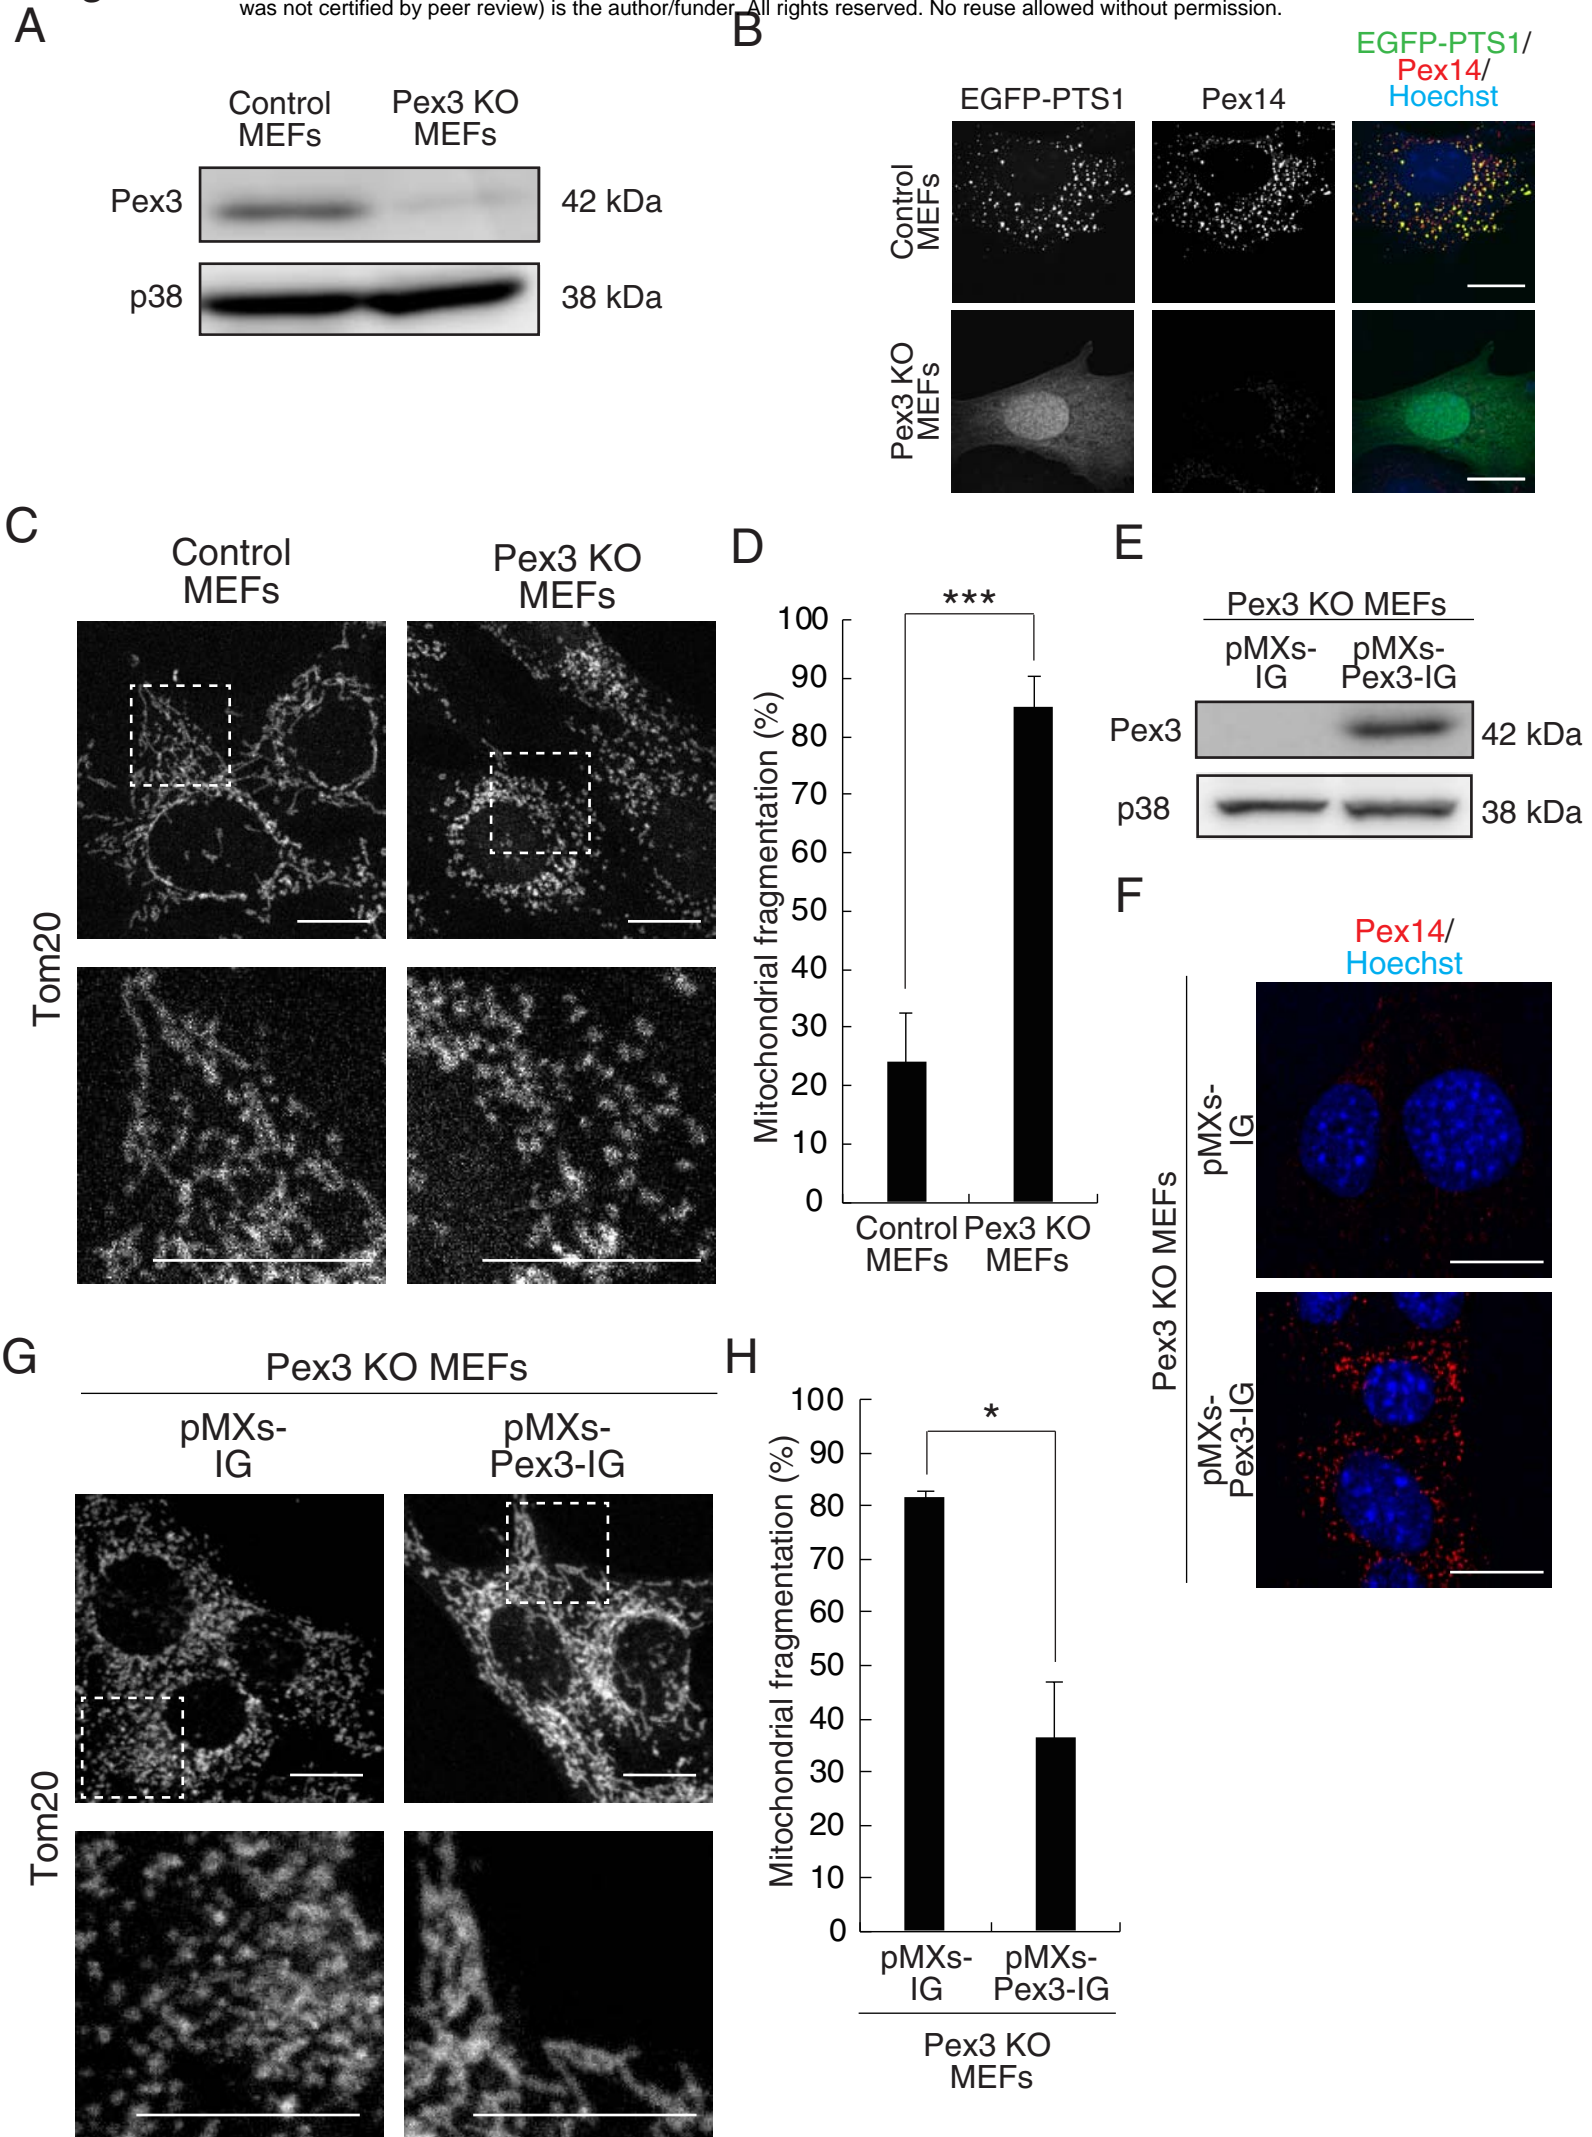

# Figure 2

bioRxiv preprint doi: <https://doi.org/10.1101/407098>; this version posted September 3, 2018. The copyright holder for this preprint (which was not certified by peer review) is the author/funder. All rights reserved. No reuse allowed without permission.

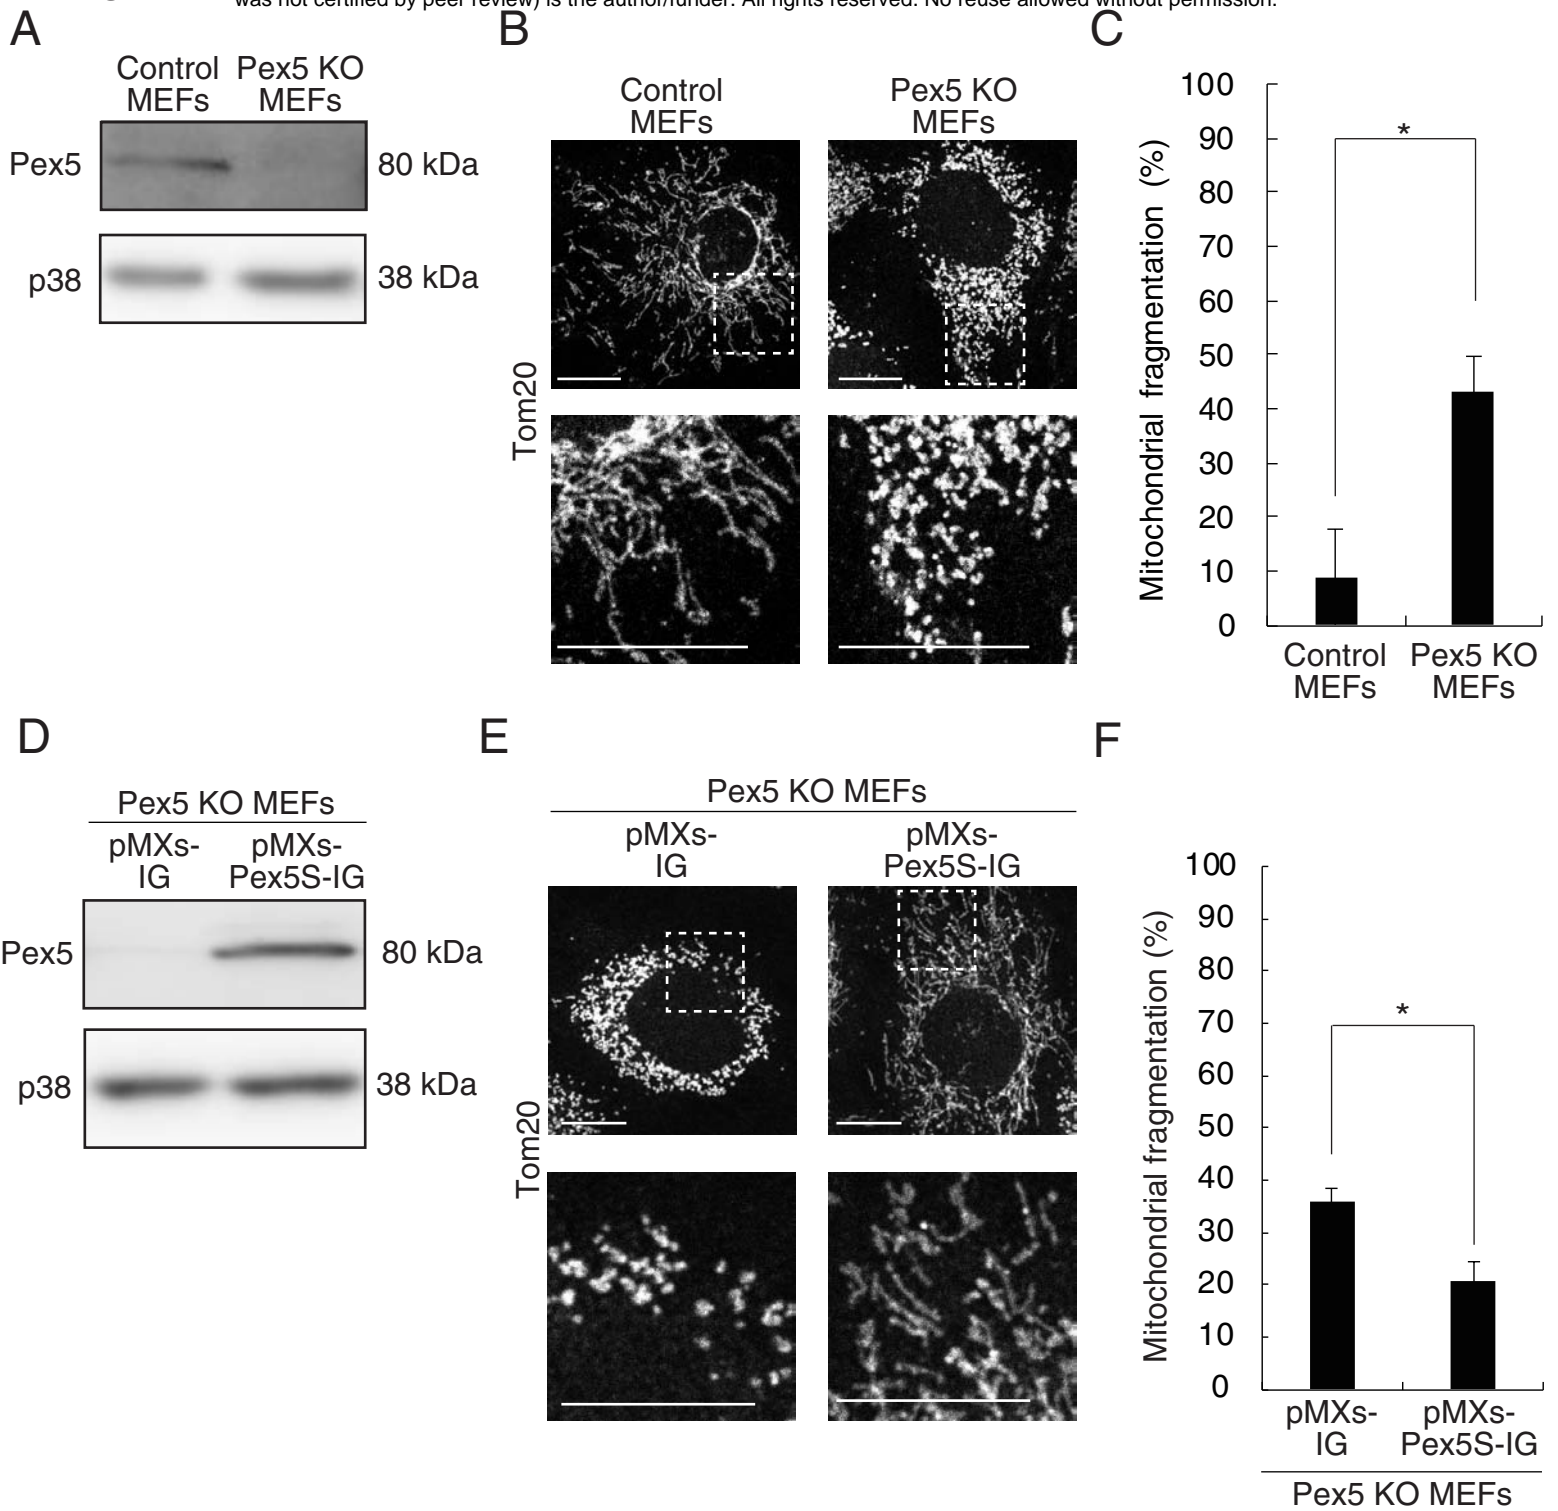

# Figure 3

bioRxiv preprint doi: <https://doi.org/10.1101/407098>; this version posted September 3, 2018. The copyright holder for this preprint (which was not certified by peer review) is the author/funder. All rights reserved. No reuse allowed without permission.

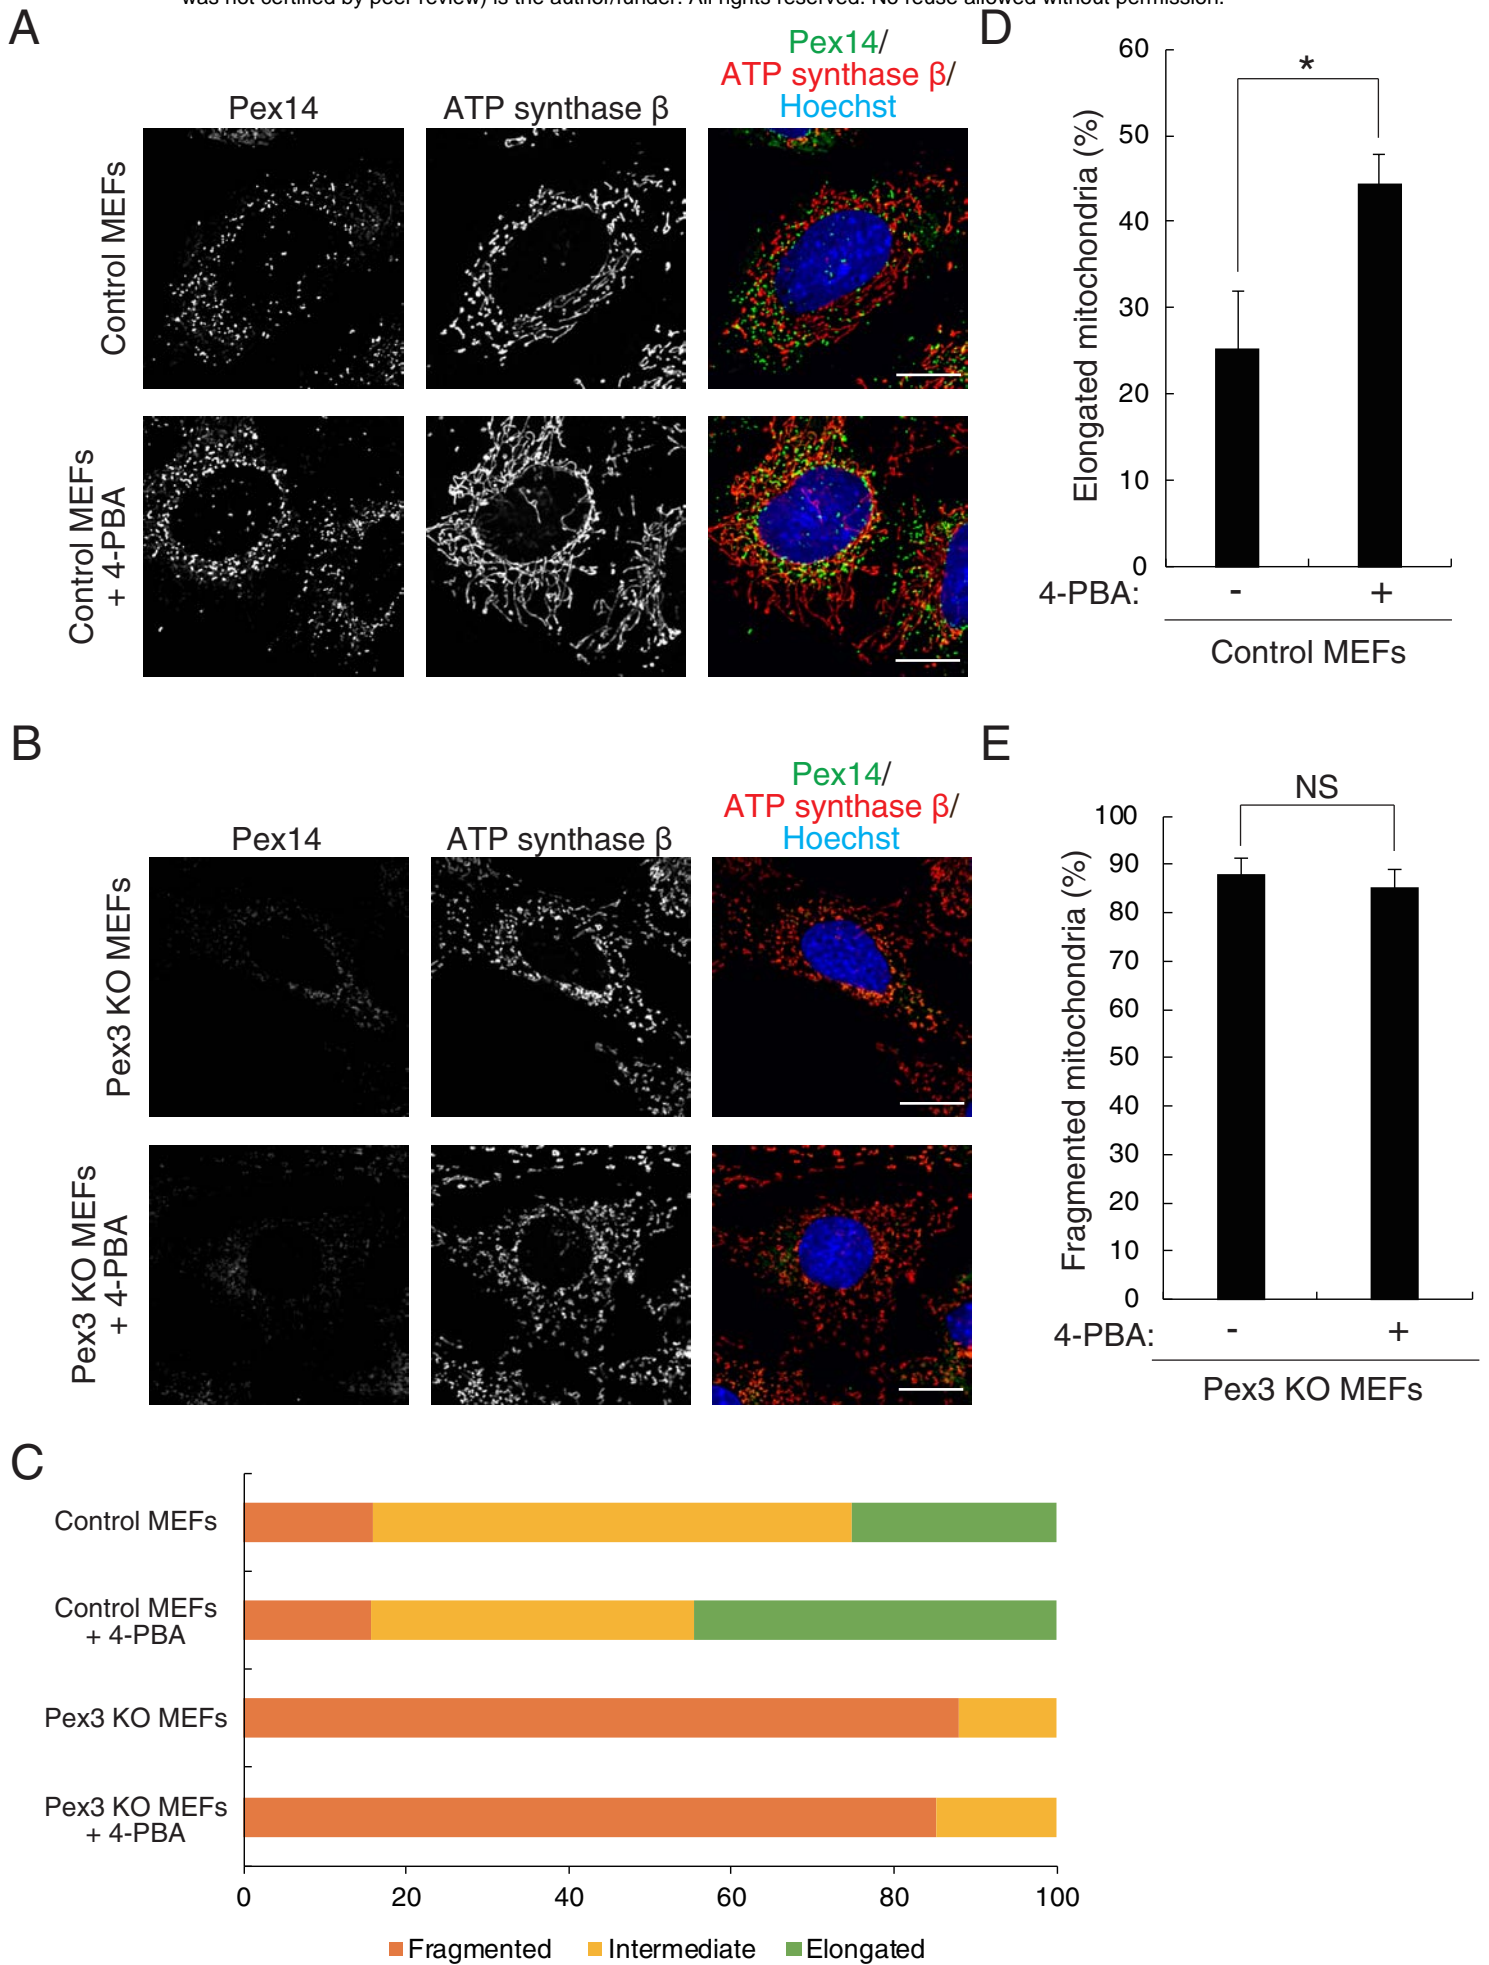

# Figure 4

bioRxiv preprint doi: <https://doi.org/10.1101/407098>; this version posted September 3, 2018. The copyright holder for this preprint (which was not certified by peer review) is the author/funder. All rights reserved. No reuse allowed without permission.

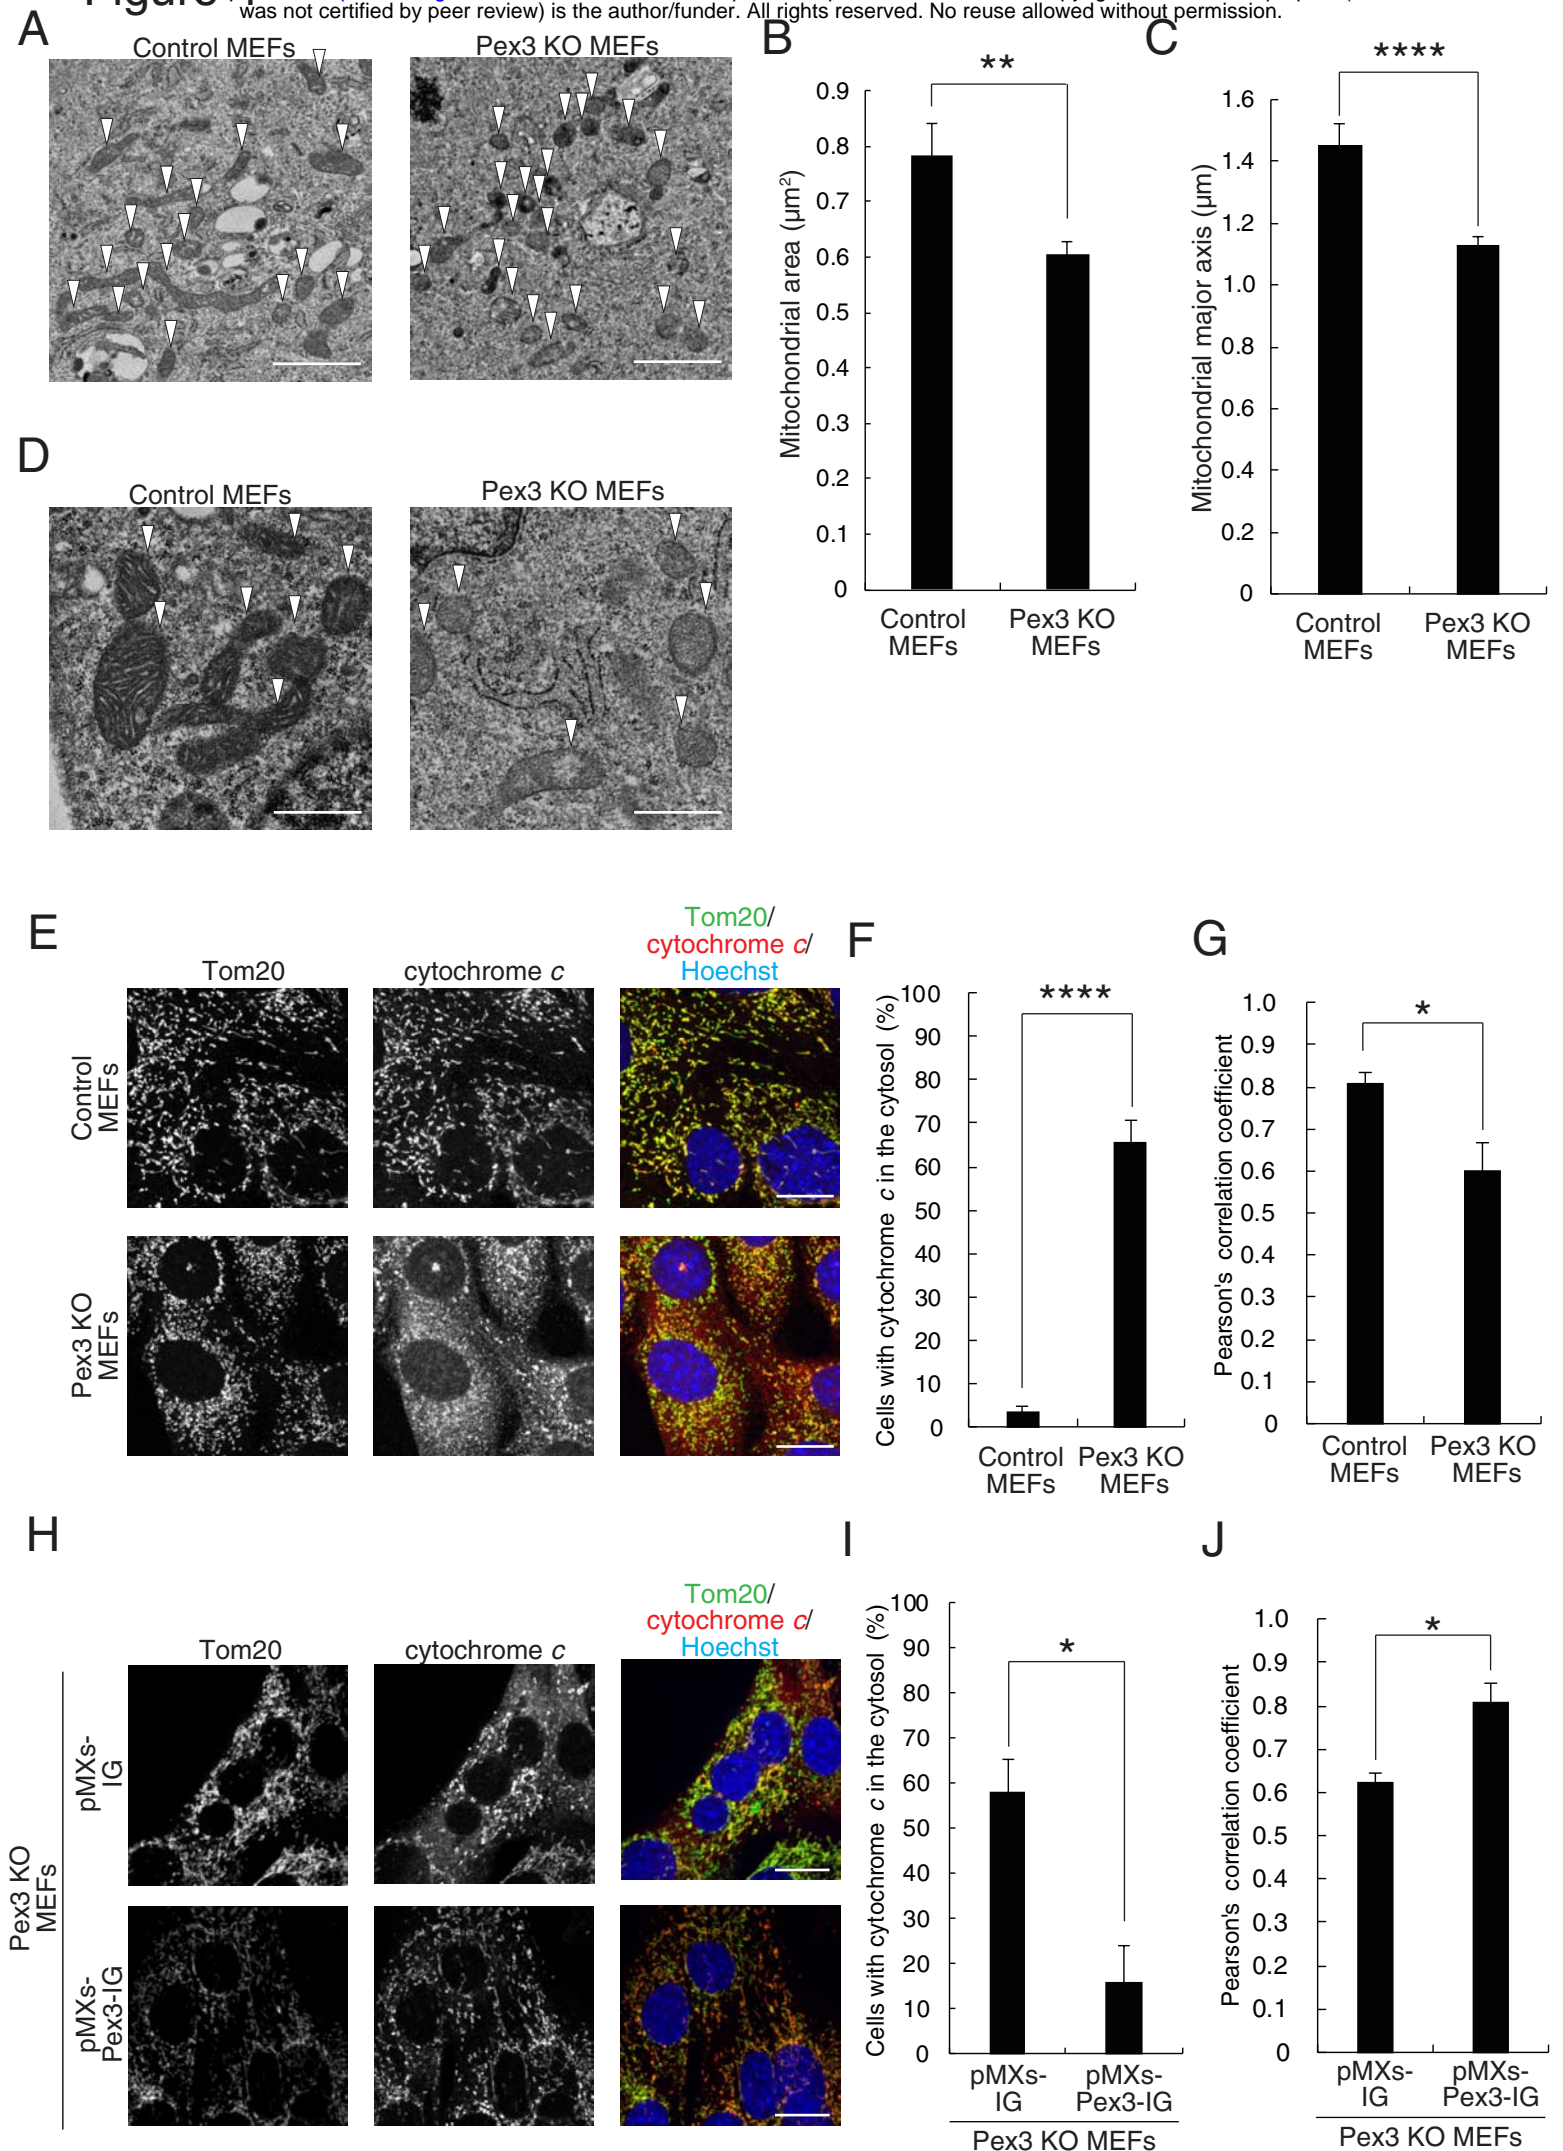

# Figure 5

bioRxiv preprint doi: <https://doi.org/10.1101/407098>; this version posted September 3, 2018. The copyright holder for this preprint (which was not certified by peer review) is the author/funder. All rights reserved. No reuse allowed without permission.

**A**

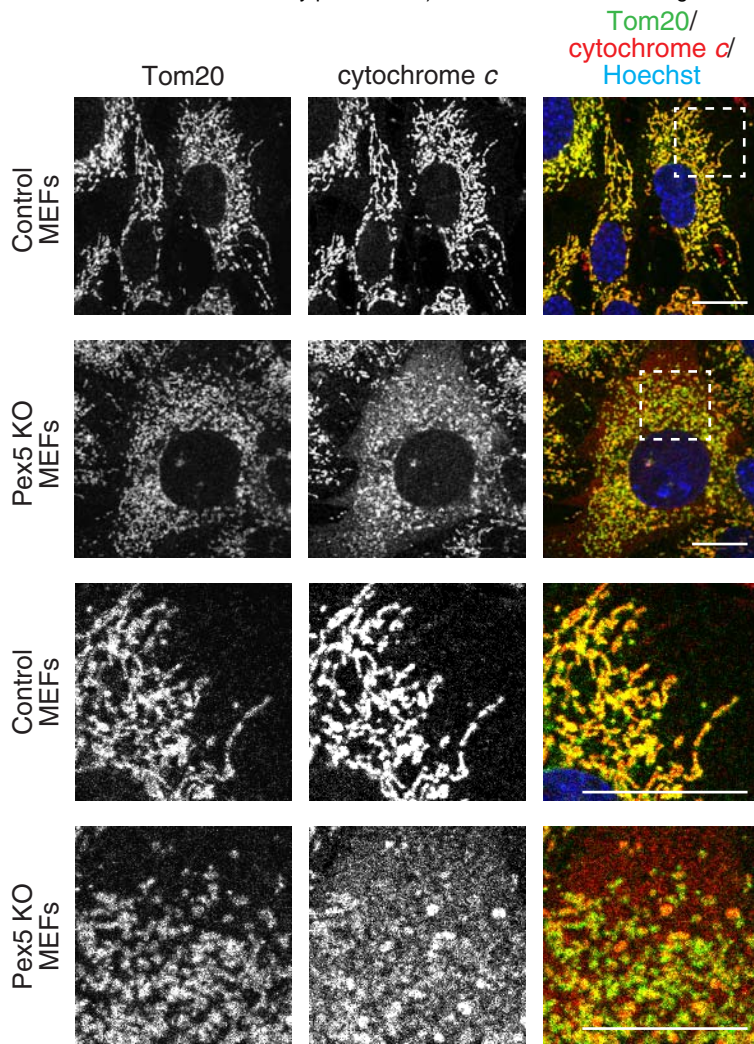

**B**

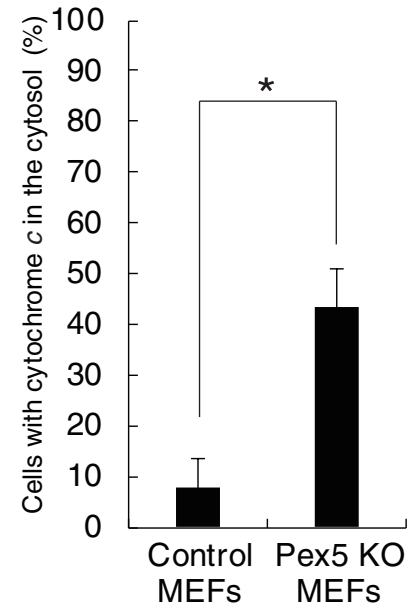

**C**

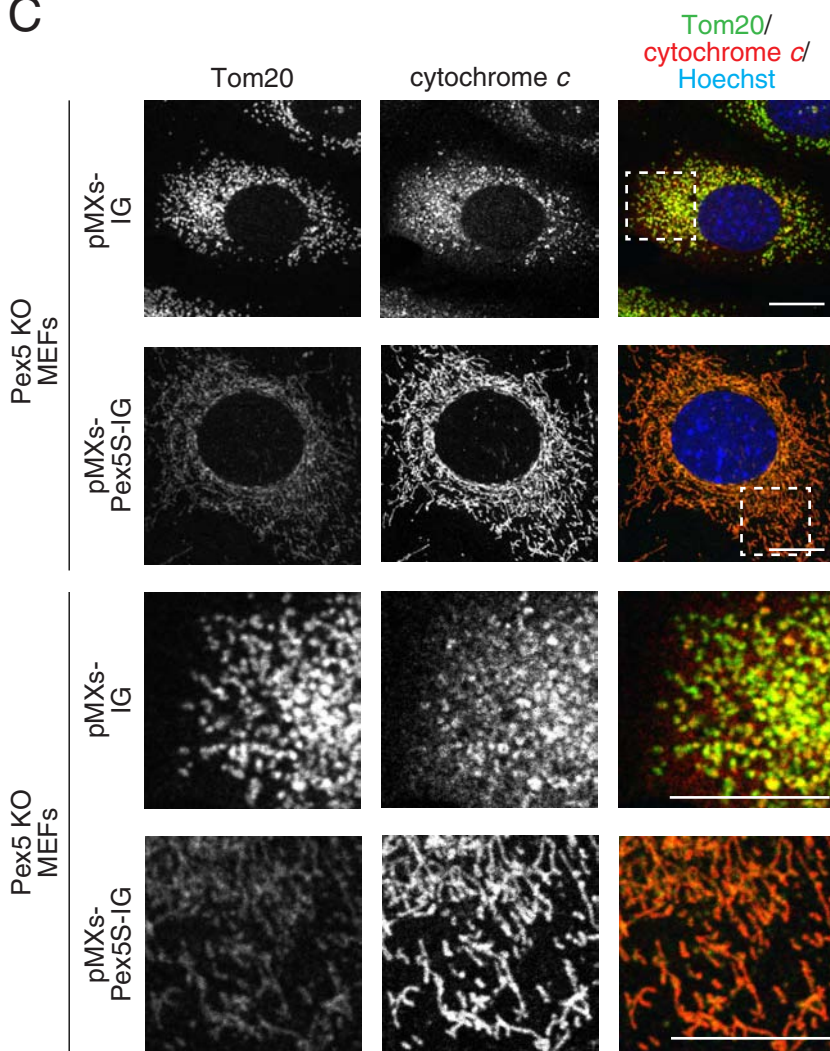

**D**

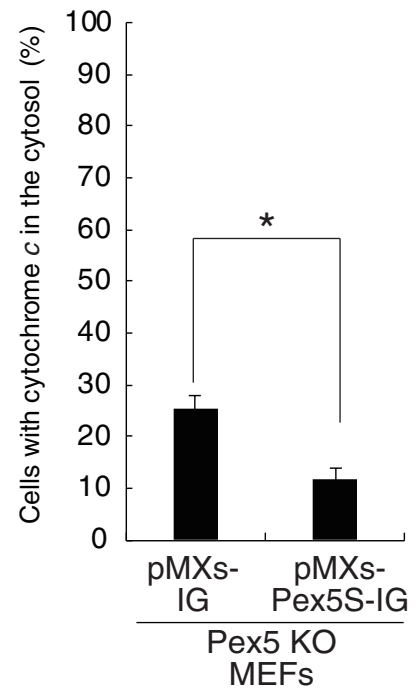



# Figure 6

bioRxiv preprint doi: <https://doi.org/10.1101/407098>; this version posted September 3, 2018. The copyright holder for this preprint (which was not certified by peer review) is the author/funder. All rights reserved. No reuse allowed without permission.

**A**

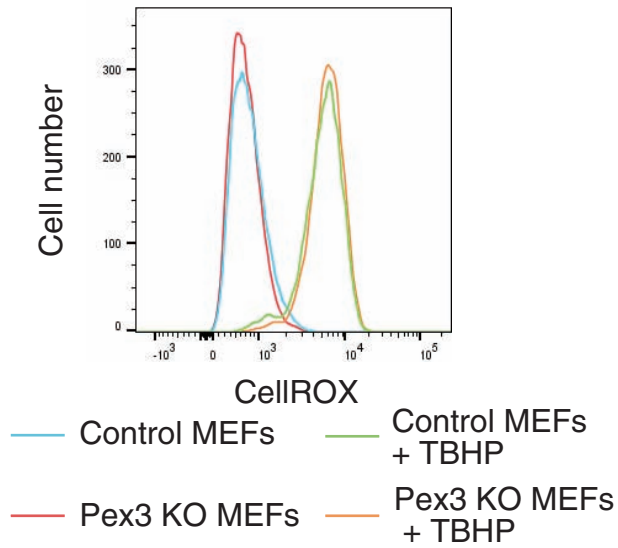

**B**

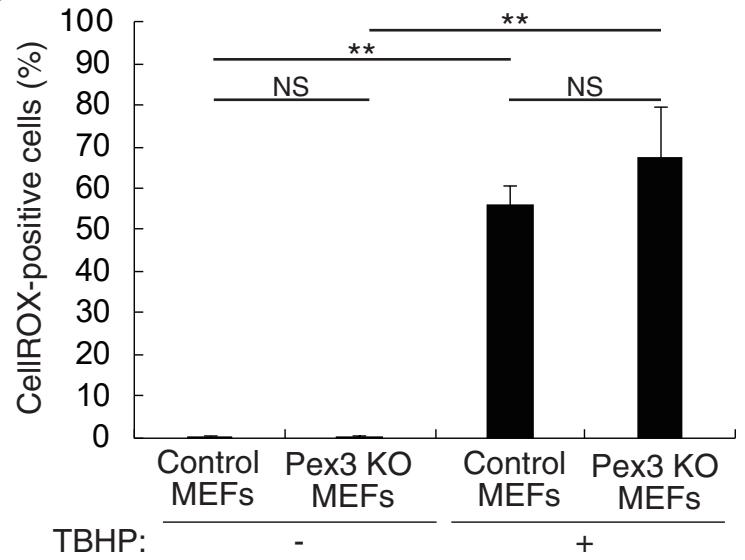

**C**

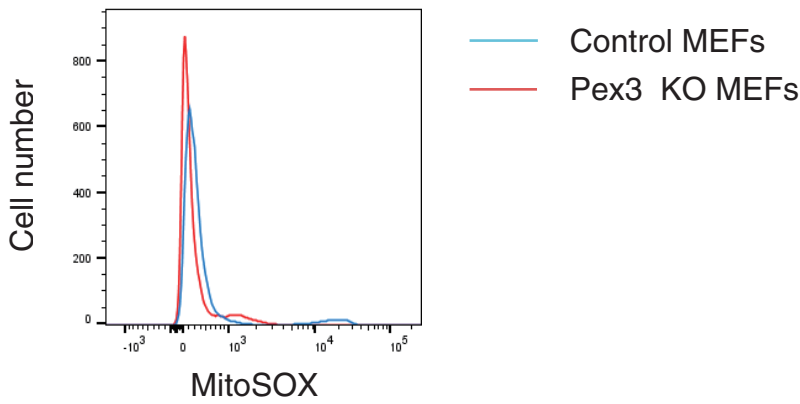

**D**

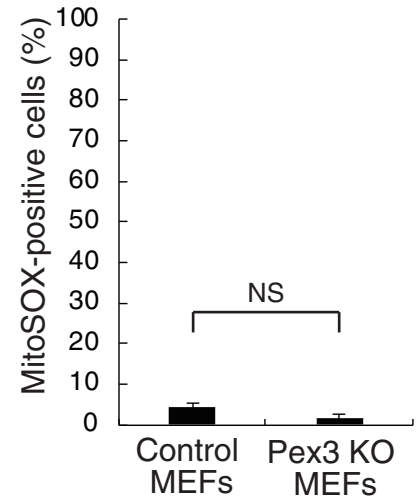

**E**

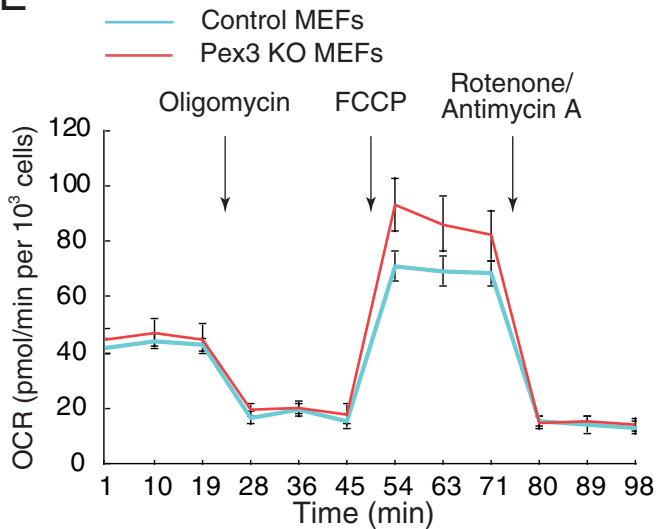

**F**

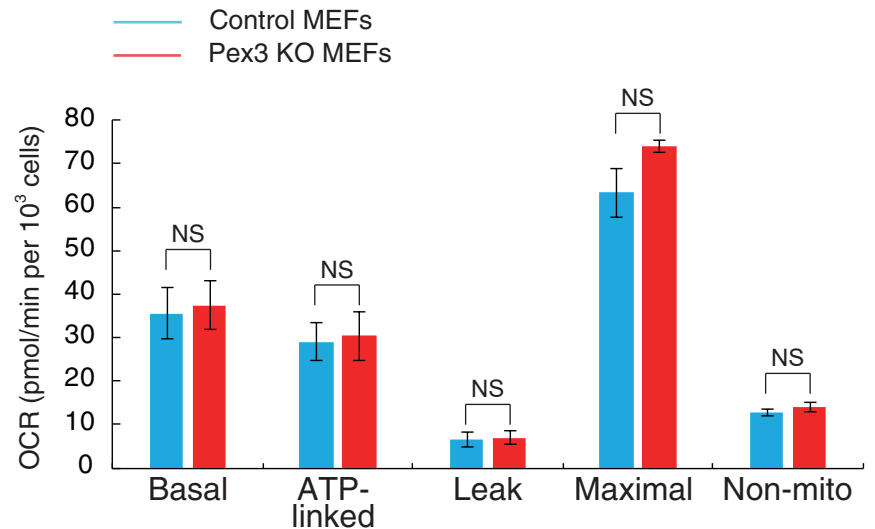

## Figure 7

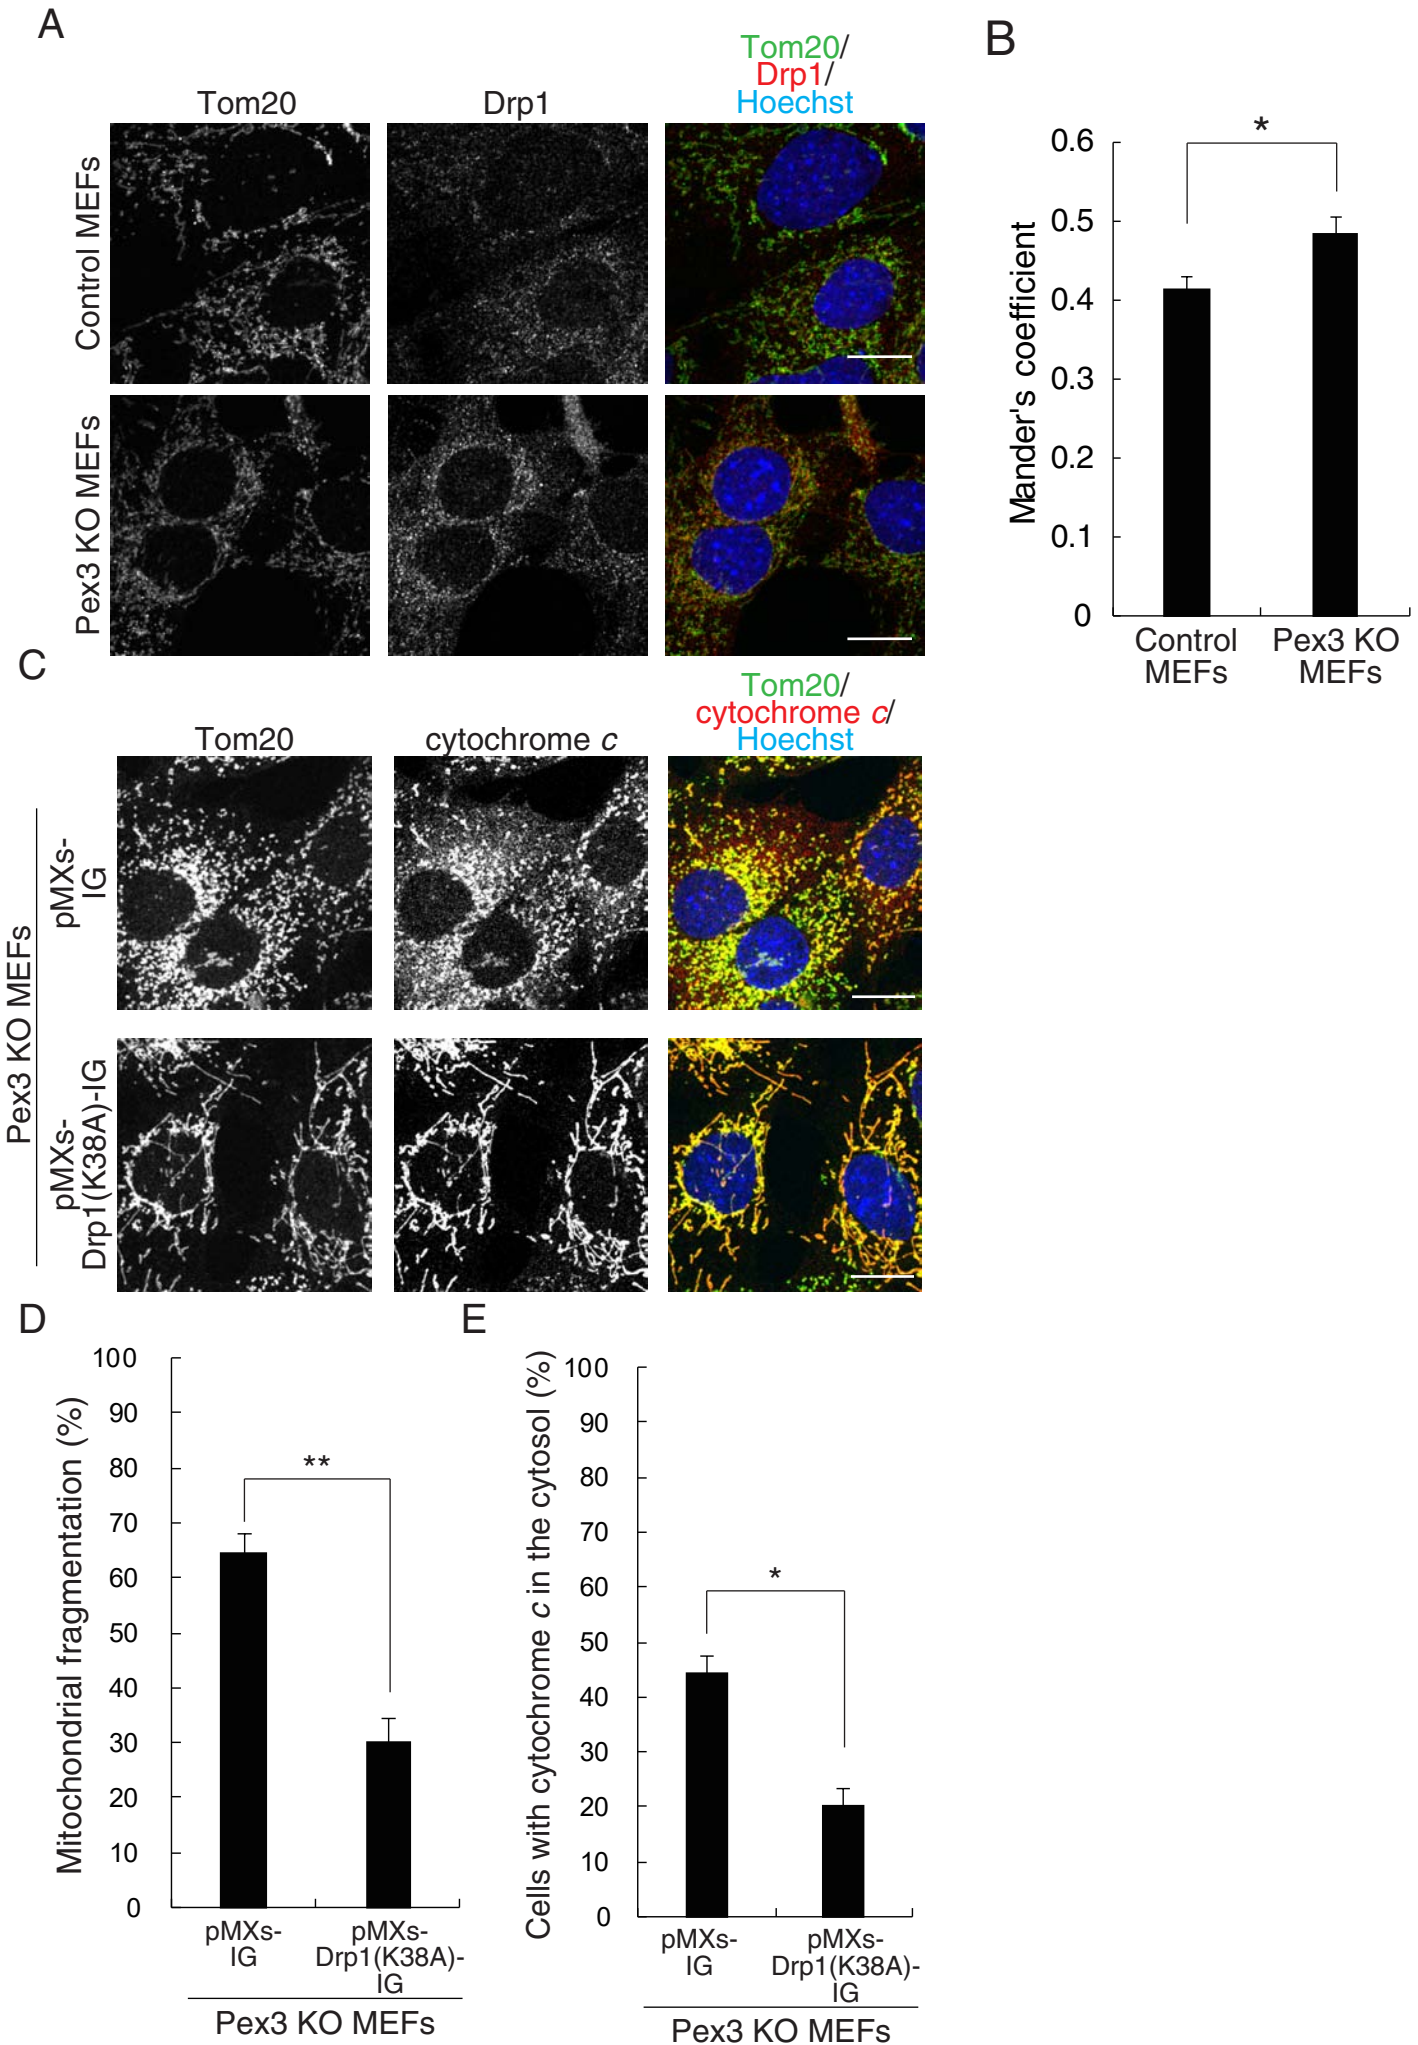

# Figure 8

bioRxiv preprint doi: <https://doi.org/10.1101/407098>; this version posted September 3, 2018. The copyright holder for this preprint (which was not certified by peer review) is the author/funder. All rights reserved. No reuse allowed without permission.

**A**

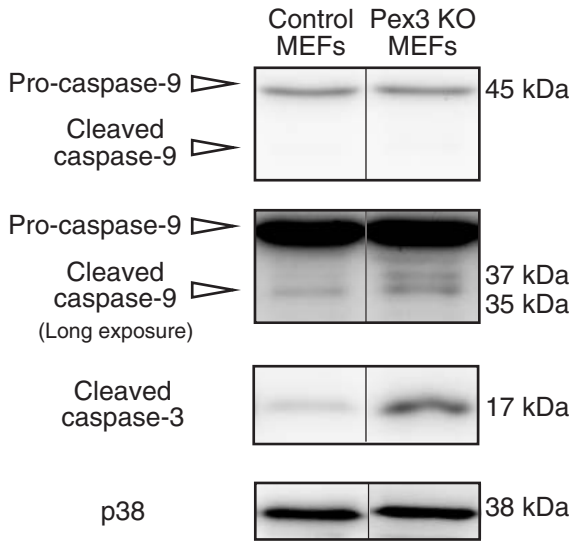

**B**

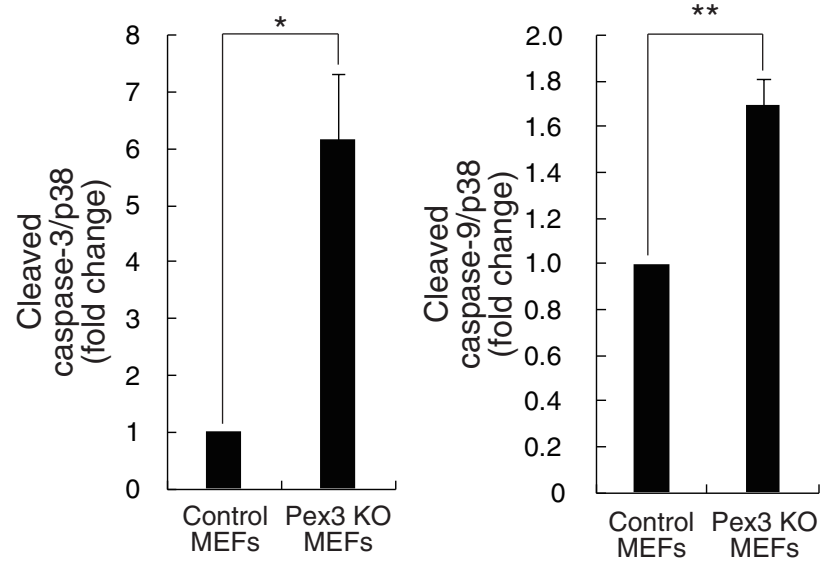

**C**

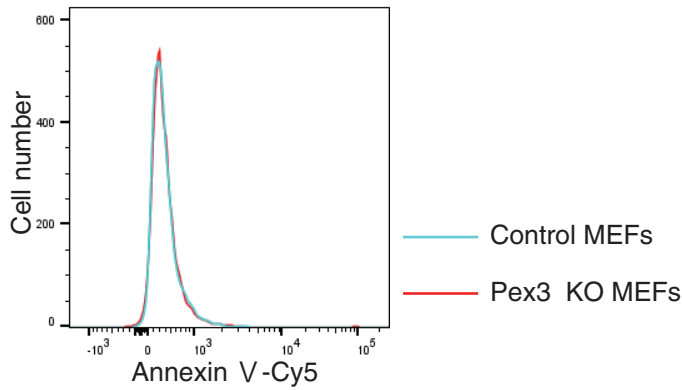

**D**

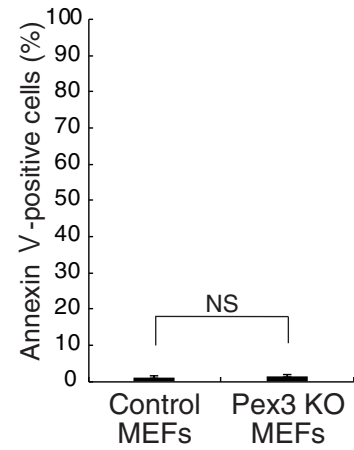

**E**

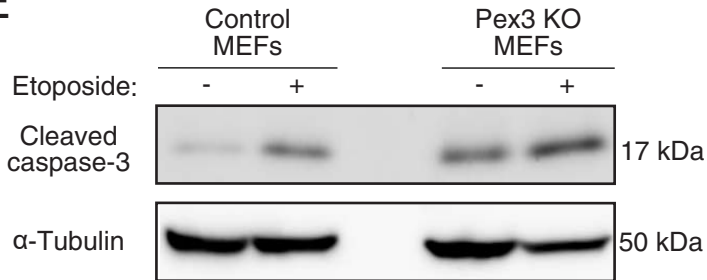

**F**

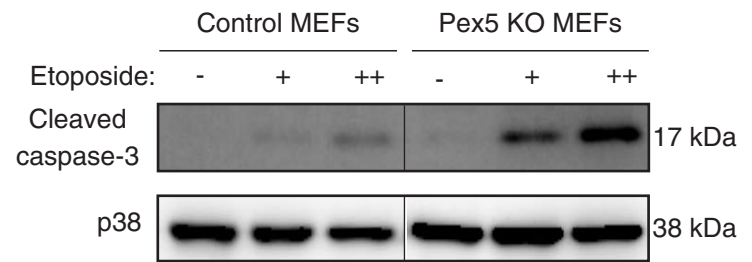

**G**

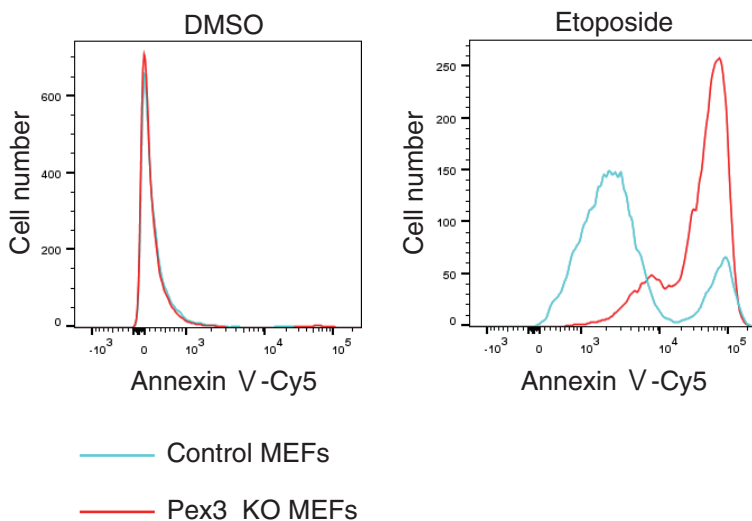

**H**

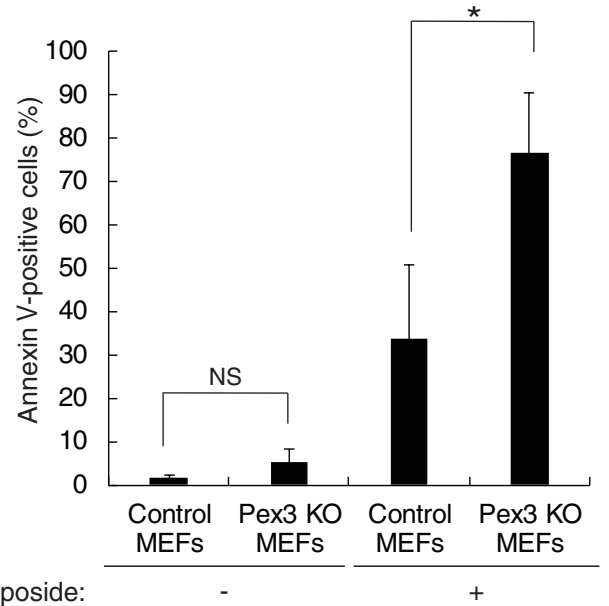

## Supplemental Figure 1

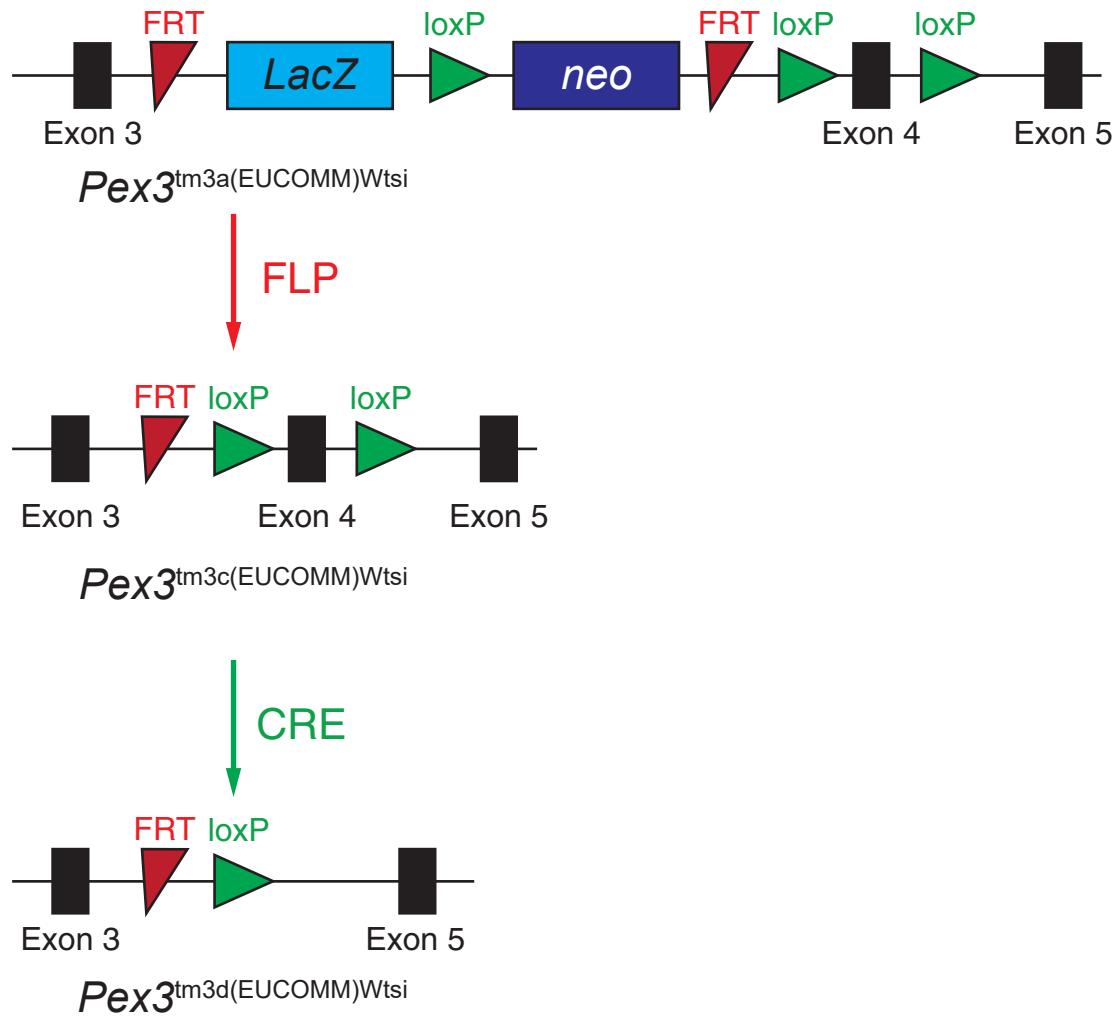

## Supplemental Figure 2

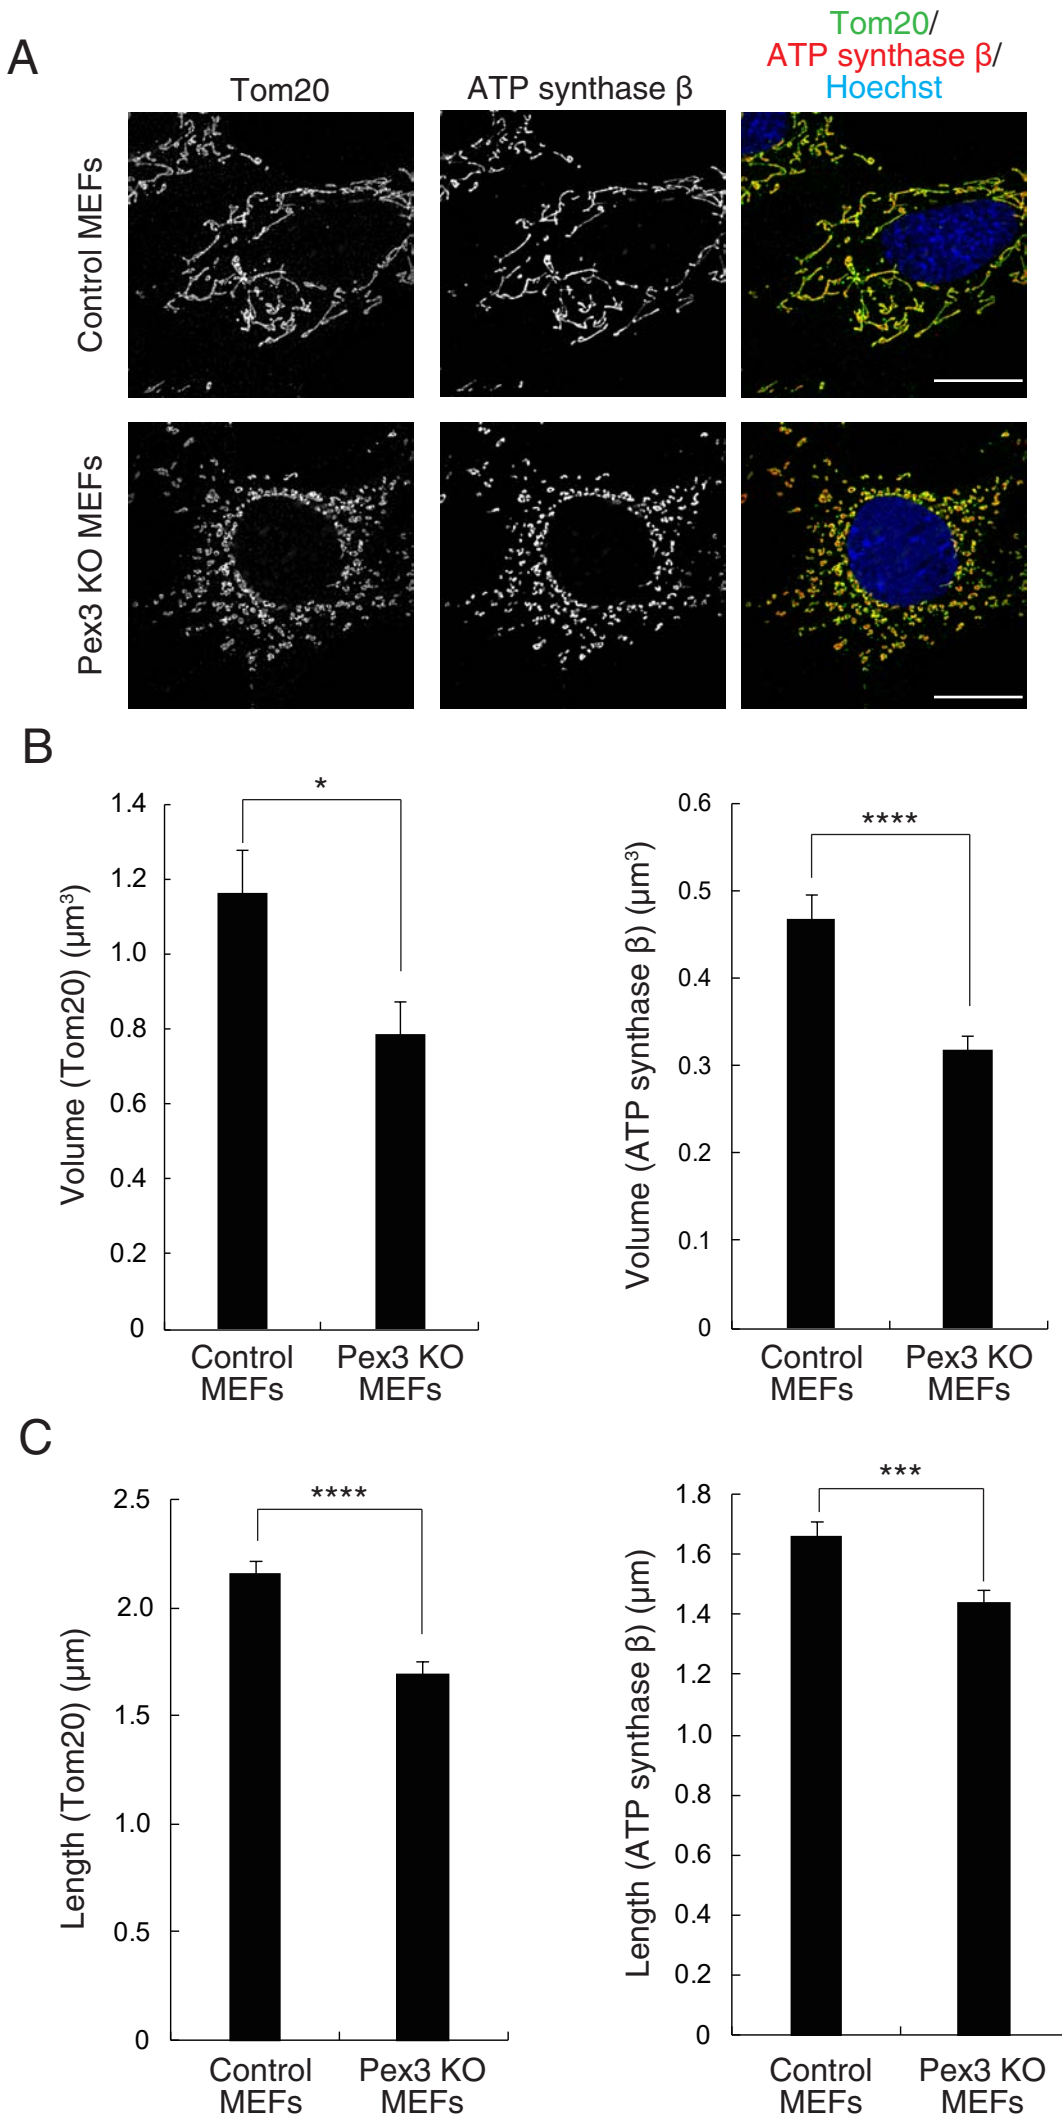

A

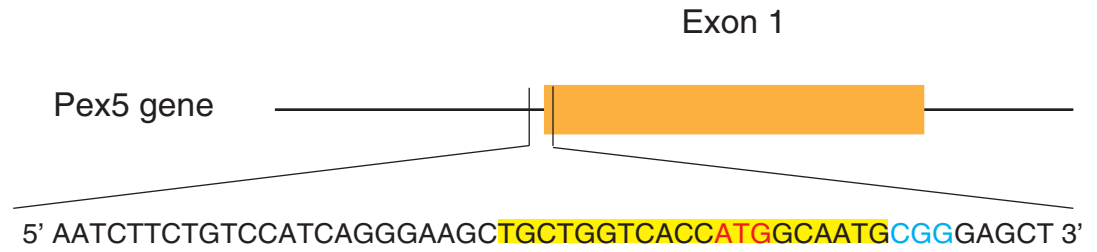

B

WT 5' GCTGGTCACCATGGCAATGCGGGAGCTGGTGGAGGGCGAATGTGGGGGTG 3'

Allele 1 5' GCTGGTCACCATGGCAA<sup>A</sup>TGCGGGAGCTGGTGGAGGGCGAATGTGGGGGT 3'

WT 5' TCCCTTCCCCAGCCCACTCCGGGTGCCTCGGCCGGTCGGACGGTGC GGCCCGCGACGGCGAGCATTGGAGC  
 Allele 2 5' TCCCTTCCCCAGCCCACTCCGGGTGCCTCGGCCGGTCGGACGGTGC GGCCCGCGACGGCGAGCATTGGAGC  
 CTGGGGGCGCGGGGTGCGAGGCCCGTAAGTCCCCGCCGCTGCGGTGGCCTCGTGGGACGGGGTTCGAGGCTGGG  
 CTGGGGGCGCGGGGTGCGAGGC<sup>ACATTTCCCCGAAA</sup>  
 GCGACGGGGCTGGGGGCGCGGGGCGCTGGGCGGGGACGGGCGGGCCGGGGAGGGGGCTCAGGTGACACG  
 GTGCCACCTGACGTCTAAGAAATGTTCCAATCAGCCATGTCTGGGAAGGTCTATGTGTGGATAGAAGAAAAATTA  
 AGCTGGGATCGGGACCCGCAGCTGGCGCCTGACCGGGGTGTGGGTCCCGGTGTACGGTGGAAAGGCGTCCCC  
 CTACCATGACTGCATAGGTAGTGGATTCACAGGGACACACTGAGAGACATTGATTCTCTTGTTCAAAACCTGTC  
 GCTGTCCCTCGTCAGGTTAGAGTTCGGGTCTAGCCGTGTTTATGATGCGCTCCCCGTGCTCCCCAGGGGTCCAG  
 AAAATGATACAACATGTGAAGACACTGTTGACAGCTATACTTGTCACTGCTGGCTTGGATCATGATATTGATTACAA  
 GCCCTTTTGTAGAGCTGCTGTTGGCGGGTGGTGTCTGAGCTGCCGTCCGCTGGAGGGGAAGCCCGAGCCGAAA  
 AGACGATGACGATAAGATGGCCCCAAGAAGGTTCCGGGGCCACTTCTGATCGAGGGCGACCTGAACCCCGAC  
 GCAGCGTTTCGAGTGGGAAGGCAGGACACAGCCTCCTTGGACTCCAGACACACCTCGGGGGGTGGCCCCGG  
 AACAGCGACGTGGACAAGCTGTTTCATCCACCTCTTCGTGTGTATTGGGTCCATGTATGCTCTAGATTGACTTAAGT  
 GGGCCTGGCCCTTGTGGAGCCGTCGTGGGCCCATCTGCTCTAGATAGGGCCTGAGGCGTGCGTTGGGAAAGTCT  
 AAAAGGTAAGTGTCTGTGTAATAGATGCTGAAGAGAGAGTGCCAAGGGAACAGCTGTAAGGCCCTCTAGG  
 GGCTTCCCGACCACAGTTCTAATCTTCTGTCCATCAGGGAAGCTGCTGGTCACCATGGCAATGCGGGAGCTGGTG  
 ATCCGACTGCTGTGTAAGGAACAGCAGAAAAGCACCTGTGTTCCATCATCTGGTTATATCAGGACCTACTGTGTG  
 GAGGGCGAATGTGGGGGTGCCAACCCGCTGATGAAGCTGGCCACC 3'  
 CAGGGCGAATGTGGGGGTGCCAACCCGCTGATGAAGCTGGCCACC 3'

# Supplemental Figure 4

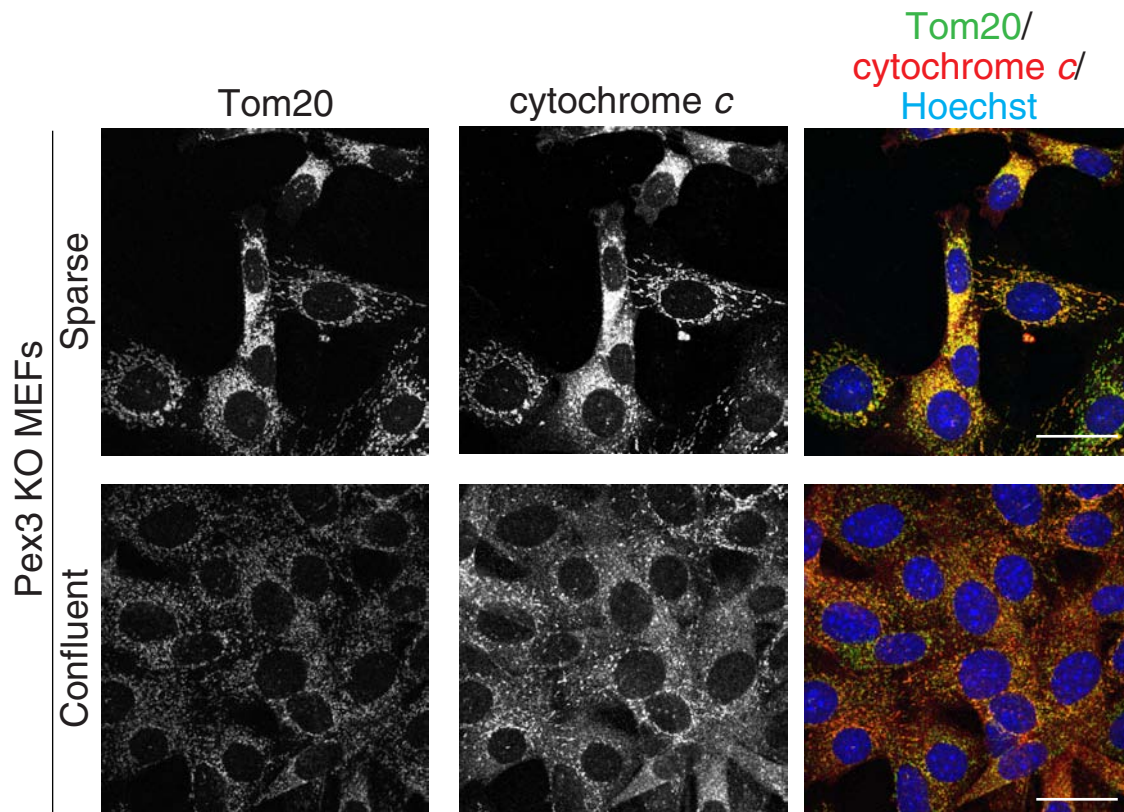

# Supplemental Figure 5

A

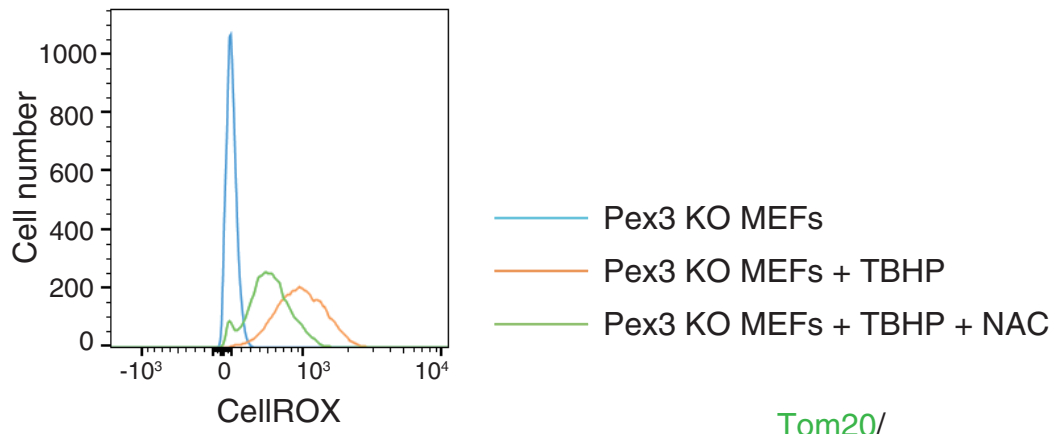

B

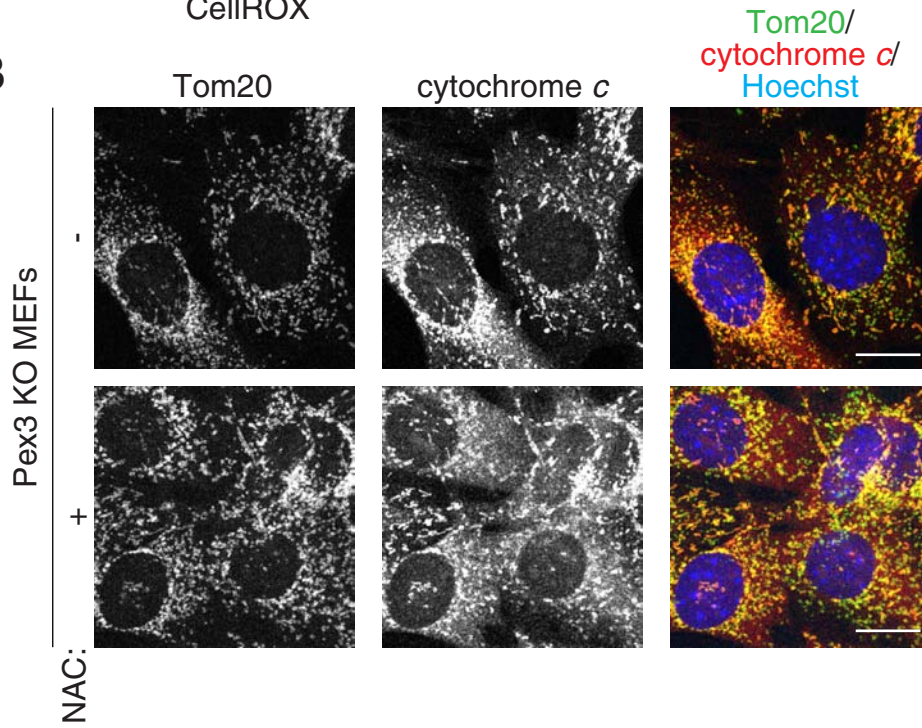

C

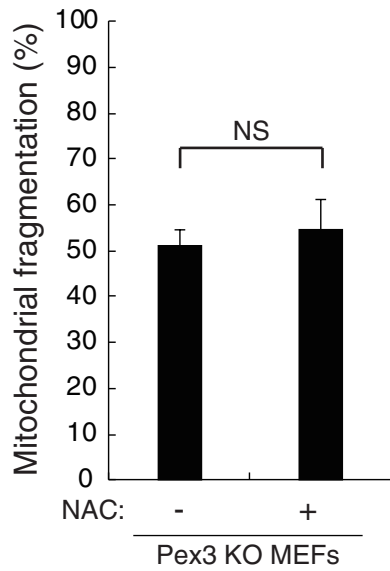

D

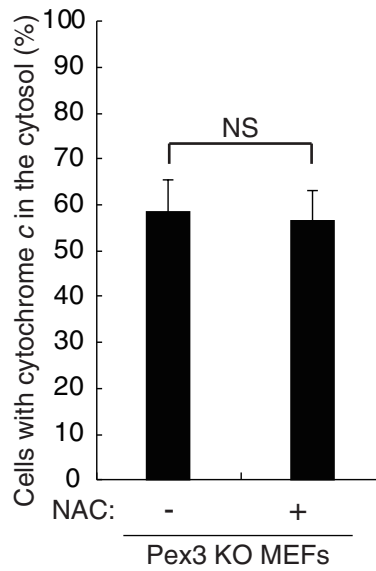

Source: https://biorxiv.org/content/biorxiv/early/2018/09/03/407098.full-text.pdf
